# Supplementary material
Source: PubMed Central journal article supplement (PMC9846691)
Supplement: ocac159_supplementary_data.pdf [file ocac159_supplementary_data.pdf]

# Scanning the medical phenome to identify new medical diagnoses after recovery from COVID-19 in a US cohort

## Supplementary Appendix

June 5, 2022

### Table of Contents

|                                                                                                   |           |
|---------------------------------------------------------------------------------------------------|-----------|
| <b>Supplementary Methods</b> .....                                                                | <b>2</b>  |
| A. Study setting.....                                                                             | 2         |
| B. Vanderbilt Research Derivative (RD).....                                                       | 2         |
| C. Vanderbilt COVID-19 registry database.....                                                     | 3         |
| D. Investigator access to database population.....                                                | 3         |
| E. Quality control of study data.....                                                             | 3         |
| F. PheWAS model design and covariates.....                                                        | 4         |
| G. Loss of follow-up and missing phecode data.....                                                | 5         |
| H. Sensitivity analyses.....                                                                      | 5         |
| I. PheWAS model variables.....                                                                    | 6         |
| J. Propensity matching analysis.....                                                              | 7         |
| <b>Supplementary Tables</b> .....                                                                 | <b>8</b>  |
| Table S1. Boolean logic to generate temporal-informed phenotypes.....                             | 8         |
| Table S2. Phecode groupings to identify Charlson comorbidities.....                               | 9         |
| Table S3. Charlson comorbidities, vital signs, and laboratory data of study population.....       | 10        |
| Table S4. Comparison of case retention across select phecode chapters.....                        | 11        |
| Table S5. PheWAS summary under naive post-acute phenotyping: top 100 associations.....            | 13        |
| Table S6. Temporal-informed PheWAS by race/ethnicity subgroups.....                               | 15        |
| Table S7. Temporal-informed PheWAS by sex.....                                                    | 16        |
| Table S8. Temporal-informed PheWAS by onset of diagnosis.....                                     | 18        |
| Table S9. Sensitivity analysis: adults with a least one follow-up visit in post-acute period..... | 20        |
| Table S10. Sensitivity analysis: phenotype case definition of one post-acute phecode.....         | 21        |
| Table S11. Sensitivity analysis: adults with $\geq 6$ months of EHR records prior to testing..... | 24        |
| Table S12. Sensitivity analysis: propensity-matched cohort.....                                   | 25        |
| Table S13. Covariate balance in propensity-matched cohort.....                                    | 26        |
| <b>Supplementary Figures</b> .....                                                                | <b>27</b> |
| Figure S1. Study CONSORT diagram.....                                                             | 27        |
| Figure S2. Control retention by temporal-informed phenotyping.....                                | 28        |
| Figure S3. Phenome scan of phenotypes occurring around date of SARS-CoV-2 testing.....            | 29        |
| Figure S4. Phenome scan using naive post-acute phenotyping.....                                   | 30        |
| Figure S5. Comparison of PheWAS results by temporal-informed or naive phenotyping.....            | 31        |
| Figure S6. Temporal-informed PheWAS: sensitivity analyses.....                                    | 32        |
| Figure S7. Changes in vital signs and laboratory test values: all assessed labs.....              | 34        |
| Figure S8. Covariate balance with propensity-score matching.....                                  | 35        |
| Figure S9. Covariate balance with propensity-score matching for continuous variables.....         | 36        |
| <b>Supplementary References</b> .....                                                             | <b>37</b> |
| <b>RECORD statement</b> .....                                                                     | <b>38</b> |

## **Supplementary Methods**

### **A. Study setting**

Study participants came from Vanderbilt University Medical Center (VUMC), a private nonprofit academic medical institution based in Nashville, Tennessee, USA. It is one of the largest medical centers in the southeastern United States and serves as an anchor for specialty and primary care for patients throughout Tennessee and the Mid-South region. VUMC has maintained an EHR since the mid-1990's and largely eliminated paper records in clinical care since 2004.[1] In 2019 before the start of the pandemic, VUMC had 1,131 licensed beds, and managed over 2 million ambulatory visits, over 110,000 emergency department visits, and over 55,000 surgical procedures annually.

### **B. Vanderbilt Research Derivative (RD)**

The Research Derivative is a database of clinical and related data derived from the Vanderbilt University Medical Center's (VUMC) clinical systems and restructured for research.[1] Data is repurposed from VUMC's enterprise data warehouse (EDW), which includes data from clinical information systems eStar (VUMC's local implementation of Epic Hyperspace®), VPIMS (Vanderbilt Perioperative Information Management Systems), ORMIS (Operating Room Management Information System), and clinical laboratory systems, as well as legacy systems including StarPanel (Vanderbilt's native electronic medical records system), Horizon Export Orders, and others. Data is transformed from the EDW to the RD using a set of custom Extract, Transform, and Load (ETL) pipelines to map data to the Observational Medical Outcomes Partnership (OMOP) common data model.[2] The medical record number and other person identifiers are preserved within the database. Data types include reimbursement codes, clinical notes and documentation, nursing records, medication data, laboratory data, encounter and visit data, and respiratory flowsheet data on mechanical ventilator and oxygen usage. Output may include structured data points, such as International Classification of Diseases (ICD) codes and encounter dates, semi-structured data such as laboratory tests and results, or unstructured data such as physician progress reports. Pertinent to this study, laboratory tests are coded as Logical Observation Identifiers Names and Codes (LOINC) and diagnoses are coded using the International Classification of Diseases, Tenth Revision, Clinical Modification (ICD-10-CM). The RD database is stored on a secure database server housed in the Vanderbilt Data Center. The database is fully compliant with the administrative, physical, and technical provisions of the Health Insurance Portability and Accountability Act of 1996 (HIPAA) Security and Privacy Rules, and operates with

oversight from the Vanderbilt Institutional Review Board. The database is maintained by VUMC's Office of Research Informatics and the Vanderbilt Institute for Clinical and Translational Research (VICTR) Big Data team under the direction of Paul Harris, PhD.

### **C. Vanderbilt COVID-19 registry database**

The COVID-19 registry utilizes a customized version of the RD specifically created to support COVID-related research efforts.[3] It captures all patients who had SARS-CoV-2 testing performed at VUMC and its associated community testing sites, outpatient clinics, urgent care centers, and affiliate hospitals. The registry collects a broad range of health data including demographics, vital signs, medical and social history, medications, self-reported symptoms, visit information, clinic notes, respiratory flowsheets, diagnostic codes, and procedural codes. The COVID-19 registry is refreshed daily to facilitate close to real-time access to research data, rather than the usual monthly refresh for the "traditional" RD as described above. Additional COVID-19-specific tables are included in the registry database specifically related to SARS-CoV-2 testing including testing dates, care sites, ordering provider, test status, indication for testing (symptoms consistent with clinical COVID-19, or one of several institutionally-determined acceptable indications for asymptomatic testing), along with test results.

### **D. Investigator access to database population**

The study authors had full access to all patient and clinical data available in the RD and COVID-19 registry database.

### **E. Quality control of study data**

**Patient-level quality control.** We excluded nine patients with missing data on date of birth or sex, or had zero visit records present in the EHR (i.e. even no visit associated with a SARS-CoV-2 PCR test). We included patients who had race or ethnicity coded as "Unknown / Not reported" as some patients choose not to provide a self-identified race or ethnicity when being registered for a care visit.

**SARS-CoV-2 testing data quality control.** we identified the records of all SARS-CoV-2 PCR tests included in VUMC's research derivative using the LOINC code 94533-7. We excluded all tests that were performed after the data censoring date (January 1, 2022) and those with invalid dates or clearly erroneous dates (e.g. testing dates before February 1, 2020). We only included test results which were

identified as completed, and not still in progress or never resulted. We also only included those laboratory test records which had a result of either “Positive” or “Not Detected”, and excluded any PCR tests with indeterminate, pending, or canceled results.

**ICD code and pcode data quality control.** As the COVID-19 registry database is updated daily, some data is subject to change as they are finalized, amended, corrected, or updated in the medical record. Pertinent to this study, ICD diagnosis codes are typically entered into the enterprise data warehouse by practitioners, but can be changed during finalization by coding specialists several days or weeks later. Our experience and that of the VICTR Big Data staff has been that ICD codes and problem lists have relatively low volatility over time.[1] To mitigate the potential for any changes in diagnosis codes, we extracted the diagnosis codes from the registry database in late February 2022 which was several weeks after the study’s data censoring date.

**Vital sign and laboratory value data quality control.** We captured vital signs and clinical laboratory test results (**Table S2**) for each patient obtained during outpatient encounters for two separate time period: (1) results within 180 days before the index SARS-CoV-2 and (2) results within 365 days after the recovery date. We took the median value for each period for final analyses. Similar to our experience with diagnosis codes, we have found relatively low volatility for these results once they are finalized in the EHR.[1]

## **F. PheWAS model design and covariates**

**Exclusions from specific phenotype analyses.** As described in the **Methods** section of the main manuscript, for each phenotype we excluded any patient who had the corresponding pcode in their medical record prior to reaching the recovery period. Reasons for this included (1) diagnoses entered into the EHR prior to the index SARS-CoV-2 PCR test, (2) diagnoses made during an inpatient hospitalization associated with the index PCR test, or (3) diagnoses made before the patient reached the 30-day recovery period. We allowed an unlimited look-back period to identify pcodes entered prior to SARS-CoV-2 testing to minimize the risk of misclassifying old diagnoses as “new” in the post-acute period. The electronic health record at Vanderbilt dates back to the early 1990s,[4] but in practice the overwhelming majority of pre-testing pcodes (98.9%) in our cohort were for diagnosis occurring within the last 20 years (after 2001).

**Pcode analyses:** For PheWAS analyses using pcodes, we required a minimum of at least 10 phenotype cases in the overall cohort. Covariates included in the PheWAS models included age, sex,

race (white, black, other/multi-ethnic, or not reported), ethnicity (Hispanic/Latino, Non-Hispanic/Non-Latino, or not reported), time under observation in the post-acute period (days), testing indication (symptomatic or asymptomatic testing), and Charlson index comorbidities present prior to SARS-CoV-2 testing using a phecode-based definition (**I. Model Variables; Supplementary Table S2**).[5,6]

**Vital sign / clinical laboratory test analyses:** Covariates included in linear regression models evaluating changes in vital sign or clinical laboratory tests included age, sex, race, ethnicity, and time between the pre-testing value and the post-acute phase value (in days).

### **G. Loss of follow-up and missing phecode data**

All patients who underwent SARS-CoV-2 testing were included in the primary analysis regardless whether they had a subsequent visit at VUMC. This is in keeping with usual practice for PheWAS as the methodology assumes that for each phenotype patients without relevant diagnosis code did not develop the phenotype and thus can be considered controls.[7]

### **H. Sensitivity analyses**

We assessed the robustness of our findings to our model assumptions using several sensitivity analyses. Firstly, we assessed the effect of our control definition and loss to follow-up by limiting the analysis to those patients who had at least one follow-up visit during the post-acute phase. Secondly, we assessed the effect of patients newly seeking care in our system during the pandemic by evaluating only those patients who had at least 2 (two) visits in our system separated by at least 6 months prior to the start of the pandemic. Thirdly, we assessed the effects of the standard PheWAS “phenotype case” by using a more relaxed “phenotype case” definition requiring a phecode only on a single visit. Lastly, we assessed the effect of bias from differences in baseline clinical variables using a propensity-matched sub-cohort which matched 3 never-infected controls to each COVID-19 survivor. Further details are provided in **Section J**.

## I. PheWAS model variables

- 1) **Age** at time of testing (years)
- 2) **Sex** coded as female or male.
- 3) **Race** coded as 4 separate binary variables: White, Black or African American, Other race or multi-racial, or Unknown/not reported.
- 4) **Ethnicity** coded as 3 separate binary variables: Hispanic or Latino, Non-Hispanic/Non-Latino, or Unknown/not reported.
- 5) **Post-acute observation time**. Number of days from start of post-acute phase (as defined in **Methods** of the main manuscript) until date of data censoring.
- 6) **Asymptomatic testing**. Binary variable indicating the patient's SARS-CoV-2 test was performed for asymptomatic screening versus symptomatic testing. Reasons for asymptomatic screening included asymptomatic admission to the hospital for another diagnosis, pre-procedural or pre-surgical screening, known SARS-CoV-2 exposure, pre-receipt of immunosuppressive or anti-neoplastic therapy, pre-transplant evaluation, or requirement for placement in post-acute care or long-term nursing care.
- 7) **Inpatient hospitalization**. Binary variable indicating if the SARS-CoV-2 test was performed within 15 days prior to an inpatient hospitalization, or performed during an inpatient hospitalization.
- 8) **Charlson comorbidities**. Each comorbidity is encoded as a binary variable indicating presence of corresponding phencode(s) on one or more visits at least 15 days prior to SARS-CoV-2 test (See **Table S2**).
  - i. **Myocardial infarction**.
  - ii. **Congestive heart failure**
  - iii. **Peripheral vascular disease**
  - iv. **Cerebrovascular disease**
  - v. **Dementia**
  - vi. **Chronic pulmonary disease**
  - vii. **Rheumatologic disease**
  - viii. **Peptic ulcer disease**
  - ix. **Diabetes**
  - x. **Mild liver disease**
  - xi. **Severe liver disease**
  - xii. **Hemiplegia or paraplegia**
  - xiii. **Renal disease**
  - xiv. **Any malignancy, including lymphoma or leukemia, not non-melanoma skin cancer.**
  - xv. **Metastatic solid tumor**
  - xvi. **AIDS or HIV infection**

## J. Propensity matching analysis

As imbalances in some clinical variables were noted between the SARS-CoV-2 positive and never-infected groups, we compared the results of performing a PheWAS using the full (unmatched) study cohort with results using a propensity-score matched sub-cohort. We generated a propensity score to estimate probability of having a positive SARS-CoV-2 test using a generalized linear model with a probit link function. We conditioned the propensity scoring model on age, sex, race, ethnicity, symptomatic testing indication, inpatient hospitalization around time of SARS-CoV-2 test, observation time after recovery (in days), and length of EHR prior to SARS-CoV-2 testing (in years). We then performed nearest neighbor matching without replacement with a 3:1 control-case ratio. Control-case ratios of 1:1 and 2:1 were also assessed but did not result in satisfactory matching performance. After matching, all standardized mean differences in the conditioning variables were below 0.1 and Kolmogorov-Smirnov statistics (maximum difference in empirical cumulative density function) demonstrated improvement for all variables (**Figure S8**), indicating acceptable matching between cases and controls (**Table S13**). Visual assessment of continuously distributed conditioning variables (age, observation time after recovery, and EHR length prior to SARS-CoV-2 testing) demonstrated that the matching improved alignment between the SARS-CoV-2 positive and never-infected control group for all variable (**Figure S9**). We did note a modest persistent difference in distributions of observation time after recovery between groups, with the SARS-CoV-2 group having a more peaked distribution of post-recovery observation time versus a more uniform distribution among the never-infected controls (**Figure S9, B**). This reflected the higher positive test rates during local waves of the pandemic, whereas the distribution of negative tests was spread more uniformly over time. Noting this modest persistent difference between exposure groups for post-recovery observation time, post-matching standardized mean difference for this variable remained acceptable at 0.045 (**Table S13**). Matching was performed using the R package *MatchIt* and visualization of covariate balance was performed using the R package *cobalt*.<sup>[8,9]</sup>

After matching, all SARS-CoV-2 cases (n=30,088) and the 90,264 never-infected controls were included in the propensity-matched analysis. We repeated the PheWAS analysis using the same covariates as in the primary analysis and compared number of significant phecode associations and effects odds ratios between the full unmatched cohort (primary analysis) and the propensity-matched cohort. Results of the propensity-matched PheWAS are reported in **Table S12** and **Figure S6**.

## Supplementary Tables

**Table S1. Boolean logic to generate temporal-informed phenotypes**

| <b>Pre-event phenotype status</b> | <b>Post-event phenotype status</b> | <b>Temporal-informed phenotype</b> | <b>Comment</b>                                                                                 |
|-----------------------------------|------------------------------------|------------------------------------|------------------------------------------------------------------------------------------------|
| Control                           | Case                               | Case                               | Phenotype cases: diagnosis is new in post-event dataset.                                       |
| Control                           | Control                            | Control                            | Phenotype controls: patients without diagnosis code in both pre-event and post-event datasets. |
| Case                              | Any                                | Exclude                            | Exclude patients with phenotype present prior to temporal event.                               |
| Exclude                           | Any                                | Exclude                            | Exclude patients with phenotype exclusion prior to temporal event.                             |
| Any                               | Exclude                            | Exclude                            | Exclude patients with phenotype exclusion after temporal event.                                |



**Table S2. Phecode groupings to identify Charlson comorbidities**

| <b>Comorbidity</b>                                                                  | <b>Phecode</b>                                                                                                                                                                                                                                                                                                                                                                                                                                                                                                                                                                    |
|-------------------------------------------------------------------------------------|-----------------------------------------------------------------------------------------------------------------------------------------------------------------------------------------------------------------------------------------------------------------------------------------------------------------------------------------------------------------------------------------------------------------------------------------------------------------------------------------------------------------------------------------------------------------------------------|
| Myocardial infarction                                                               | 411.2                                                                                                                                                                                                                                                                                                                                                                                                                                                                                                                                                                             |
| Congestive heart failure                                                            | 428, 428.1, 428.2, 428.3, 428.4                                                                                                                                                                                                                                                                                                                                                                                                                                                                                                                                                   |
| Peripheral vascular disease                                                         | 443.9, 440, 440.2, 440.21, 440.22, 442.1, 442.11, 791, 459.7                                                                                                                                                                                                                                                                                                                                                                                                                                                                                                                      |
| Cerebrovascular disease                                                             | 430, 430.1, 430.2, 430.3, 433, 433.1, 433.11, 433.12, 433.2, 433.21, 433.3, 433.31, 433.32, 433.5, 433.6, 433.8                                                                                                                                                                                                                                                                                                                                                                                                                                                                   |
| Dementia                                                                            | 290, 290.1, 290.13, 290.16                                                                                                                                                                                                                                                                                                                                                                                                                                                                                                                                                        |
| Chronic pulmonary disease                                                           | 497, 496.2, 496.21, 496.1, 495, 495.2, 495.1, 495.11, 496.3, 500.1, 500.2, 496, 500                                                                                                                                                                                                                                                                                                                                                                                                                                                                                               |
| Rheumatologic disease                                                               | 695.42, 709.2, 709.3, 709.4, 709.5, 709.6, 709.7, 714, 714.1, 714.2, 717                                                                                                                                                                                                                                                                                                                                                                                                                                                                                                          |
| Peptic ulcer disease                                                                | 531, 531.1, 531.2, 531.3, 531.4, 531.5                                                                                                                                                                                                                                                                                                                                                                                                                                                                                                                                            |
| Diabetes                                                                            | 250, 250.1, 250.11, 250.12, 250.13, 250.14, 250.15, 250.2, 250.21, 250.22, 250.23, 250.24, 250.25, 250.3                                                                                                                                                                                                                                                                                                                                                                                                                                                                          |
| Mild liver disease                                                                  | 317.11, 070, 070.1, 070.2, 070.3, 070.4, 571.5, 571.51, 571.6                                                                                                                                                                                                                                                                                                                                                                                                                                                                                                                     |
| Severe liver disease                                                                | 530.2, 571.8, 571.81                                                                                                                                                                                                                                                                                                                                                                                                                                                                                                                                                              |
| Hemiplegia or paraplegia                                                            | 334.1, 342, 343, 344                                                                                                                                                                                                                                                                                                                                                                                                                                                                                                                                                              |
| Renal disease                                                                       | 401.2, 401.22, 580.1, 580.11, 580.12, 580.14, 580.3, 580.31, 580.32, 585.4, 585.34, 585.2, 588, 588.1, 588.2                                                                                                                                                                                                                                                                                                                                                                                                                                                                      |
| Any malignancy, including lymphoma or leukemia, excluding non-melanoma skin cancer. | 145, 145.1, 145.2, 145.3, 145.4, 145.5, 149, 149.1, 149.2, 149.3, 149.4, 145.9, 150, 151, 153, 153.2, 153.3, 155, 155.1, 157, 158, 159, 159.2, 159.3, 159.4, 164, 165, 165.1, 170, 170.1, 170.2, 172.11, 174, 174.1, 174.11, 174.2, 174.3, 180, 180.1, 180.3, 182, 184, 184.1, 184.2, 185, 187, 187.1, 187.2, 187.8, 189, 189.1, 189.11, 189.12, 189.2, 189.21, 189.4, 190, 191, 191.1, 191.11, 193, 194, 195, 195.1, 195.3, 200, 200.1, 201, 202, 202.2, 202.21, 202.22, 202.23, 202.24, 204, 204.1, 204.11, 204.12, 204.2, 204.21, 204.22, 204.3, 204.4, 202.22, 202.23, 202.24 |
| Metastatic solid tumor                                                              | 195.1, 198, 198.1, 198.2, 198.3, 198.4, 198.5, 198.6, 198.7                                                                                                                                                                                                                                                                                                                                                                                                                                                                                                                       |
| AIDS or HIV infection                                                               | 071, 071.1                                                                                                                                                                                                                                                                                                                                                                                                                                                                                                                                                                        |

**Table S3. Charlson comorbidities, vital signs, and laboratory data of study population**

| Characteristic                                                                                                    | Never Infected | SARS-CoV-2 Positive | Overall      |
|-------------------------------------------------------------------------------------------------------------------|----------------|---------------------|--------------|
| Number in cohort                                                                                                  | 156,017        | 30,088              | 186,105      |
| Comorbidities prior to SARS-CoV-2 test (%) <sup>a</sup>                                                           |                |                     |              |
| Congestive heart failure                                                                                          | 4,678 (3.0)    | 630 (2.1)           | 5,308 (2.9)  |
| Diabetes                                                                                                          | 10,702 (6.9)   | 1,964 (6.5)         | 12,666 (6.8) |
| Myocardial infarction                                                                                             | 2,880 (1.8)    | 419 (1.4)           | 3,299 (1.8)  |
| Peripheral vascular disease                                                                                       | 2,464 (1.6)    | 325 (1.1)           | 2,789 (1.5)  |
| Cerebrovascular disease                                                                                           | 4,289 (2.7)    | 610 (2.0)           | 4,899 (2.6)  |
| Dementia                                                                                                          | 787 (0.5)      | 137 (0.5)           | 924 (0.5)    |
| Chronic pulmonary disease                                                                                         | 9,580 (6.1)    | 1,646 (5.5)         | 11,226 (6.0) |
| Rheumatologic disease                                                                                             | 3,097 (2.0)    | 428 (1.4)           | 3,525 (1.9)  |
| Peptic ulcer disease                                                                                              | 876 (0.6)      | 147 (0.5)           | 1,023 (0.5)  |
| Mild liver disease                                                                                                | 4,941 (3.2)    | 726 (2.4)           | 5,667 (3.0)  |
| Severe liver disease                                                                                              | 1,448 (0.9)    | 170 (0.6)           | 1,618 (0.9)  |
| Hemiplegia or paraplegia                                                                                          | 1,035 (0.7)    | 153 (0.5)           | 1,188 (0.6)  |
| Renal disease                                                                                                     | 3,978 (2.5)    | 750 (2.5)           | 4,728 (2.5)  |
| Any malignancy                                                                                                    | 12,045 (7.7)   | 1,463 (4.9)         | 13,508 (7.3) |
| Metastatic solid tumor                                                                                            | 2,129 (1.4)    | 246 (0.8)           | 2,375 (1.3)  |
| AIDS or HIV infection                                                                                             | 1,065 (0.7)    | 173 (0.6)           | 1,238 (0.7)  |
| Vital sign or laboratory values prior to test, (mean, SD)                                                         |                |                     |              |
| Body Mass Index (kg/m <sup>2</sup> )                                                                              | 24.81 (3.12)   | 24.81 (3.07)        | 24.81 (3.11) |
| Systolic Blood Pressure (mmHg)                                                                                    | 121 (15)       | 120 (13)            | 121 (14)     |
| Heart Rate (bpm)                                                                                                  | 77 (11)        | 77 (11)             | 77 (11)      |
| Respiratory Rate (min <sup>-1</sup> )                                                                             | 17 (2)         | 17 (2)              | 17 (2)       |
| Oxygen saturation by pulse oximetry (SpO <sub>2</sub> , %)                                                        | 98 (2)         | 98 (2)              | 98 (2)       |
| White Blood Cell Count (10 <sup>3</sup> /μL)                                                                      | 6.8 (1.6)      | 6.8 (1.6)           | 6.8 (1.6)    |
| Hemoglobin (gm/dL)                                                                                                | 13.8 (1.5)     | 14.0 (1.4)          | 13.9 (1.4)   |
| Platelet Count (10 <sup>3</sup> /μL)                                                                              | 247 (55)       | 250 (53)            | 247 (54)     |
| Serum Potassium (mEq/L)                                                                                           | 4.1 (0.3)      | 4.1 (0.3)           | 4.1 (0.3)    |
| Serum Creatinine (mg/dL)                                                                                          | 0.92 (0.21)    | 0.92 (0.19)         | 0.92 (0.20)  |
| Estimated glomerular filtration rate (ml/min)                                                                     | 82 (19)        | 83 (18)             | 82 (19)      |
| Hemoglobin A1C (%)                                                                                                | 5.6 (0.7)      | 5.6 (0.6)           | 5.6 (0.7)    |
| Serum glucose (mg/dL)                                                                                             | 98 (20)        | 98 (19)             | 98 (20)      |
| Time between pre-testing and post-recovery vital sign or laboratory assessment, in days. (mean, SD). <sup>b</sup> |                |                     |              |
| BMI                                                                                                               | 206 (123)      | 214 (113)           | 207 (122)    |
| Pulse                                                                                                             | 219 (124)      | 250 (115)           | 224 (123)    |
| Blood pressure                                                                                                    | 225 (123)      | 249 (114)           | 228 (122)    |
| Respiratory rate                                                                                                  | 244 (126)      | 252 (113)           | 246 (124)    |
| Oxygen saturation by pulse oximetry                                                                               | 242 (127)      | 252 (112)           | 244 (125)    |
| White blood cell count                                                                                            | 268 (129)      | 263 (112)           | 267 (127)    |
| Hemoglobin level                                                                                                  | 263 (124)      | 274 (113)           | 265 (122)    |
| Platelet count                                                                                                    | 265 (128)      | 263 (112)           | 265 (125)    |
| Serum potassium                                                                                                   | 258 (124)      | 269 (112)           | 260 (122)    |
| Estimated glomerular filtration rate                                                                              | 259 (125)      | 268 (112)           | 261 (123)    |
| Hemoglobin A1C                                                                                                    | 255 (125)      | 265 (113)           | 257 (123)    |
| Serum glucose                                                                                                     | 319 (108)      | 314 (101)           | 318 (107)    |

<sup>a</sup> Phecodes used to identify Charlson comorbidities are provided in Supplementary Table S2.

<sup>b</sup> Pre-testing values were collected up to 180 days prior to index SARS-CoV-2 testing for all vitals and lab values, and post-recovery values were allowed up to 1 year after entering the post-recovery period.

**Table S4. Comparison of case retention across select phecode chapters.**

| <b>Phecode chapter</b> | <b>Case retention (Median [IQR])</b> | <b>Comparator chapter</b> | <b>Case retention (Median [IQR])</b> | <b>P</b>   |
|------------------------|--------------------------------------|---------------------------|--------------------------------------|------------|
| neoplasms              | 18% [11% - 33%]                      | infectious diseases       | 40% [24% - 56%]                      | ≤ 0.0001 * |
| "                      | "                                    | endocrine/metabolic       | 28% [19% - 44%]                      | ≤ 0.0001 * |
| "                      | "                                    | hematopoietic             | 35% [24% - 45%]                      | 0.00024 *  |
| "                      | "                                    | mental disorders          | 35% [24% - 56%]                      | ≤ 0.0001 * |
| "                      | "                                    | neurological              | 35% [22% - 48%]                      | ≤ 0.0001 * |
| "                      | "                                    | sense organs              | 38% [27% - 50%]                      | ≤ 0.0001 * |
| "                      | "                                    | circulatory system        | 32% [24% - 43%]                      | ≤ 0.0001 * |
| "                      | "                                    | respiratory               | 33% [26% - 51%]                      | ≤ 0.0001 * |
| "                      | "                                    | digestive                 | 32% [16% - 50%]                      | ≤ 0.0001 * |
| "                      | "                                    | genitourinary             | 41% [30% - 57%]                      | ≤ 0.0001 * |
| "                      | "                                    | pregnancy complications   | 47% [37% - 60%]                      | ≤ 0.0001 * |
| "                      | "                                    | dermatologic              | 48% [28% - 59%]                      | ≤ 0.0001 * |
| "                      | "                                    | musculoskeletal           | 47% [33% - 58%]                      | ≤ 0.0001 * |
| "                      | "                                    | congenital anomalies      | 25% [18% - 43%]                      | 0.0016     |
| "                      | "                                    | symptoms                  | 46% [38% - 57%]                      | ≤ 0.0001 * |
| "                      | "                                    | injuries & poisonings     | 42% [32% - 55%]                      | ≤ 0.0001 * |
| dermatologic           | 48% [28% - 59%]                      | infectious diseases       | 40% [24% - 56%]                      | 0.32       |
| "                      | "                                    | neoplasms                 | 18% [11% - 33%]                      | ≤ 0.0001 * |
| "                      | "                                    | endocrine/metabolic       | 28% [19% - 44%]                      | ≤ 0.0001 * |
| "                      | "                                    | hematopoietic             | 35% [24% - 45%]                      | 0.00031 *  |
| "                      | "                                    | mental disorders          | 35% [24% - 56%]                      | 0.01       |
| "                      | "                                    | neurological              | 35% [22% - 48%]                      | 0.0023     |
| "                      | "                                    | sense organs              | 38% [27% - 50%]                      | 0.04       |
| "                      | "                                    | circulatory system        | 32% [24% - 43%]                      | ≤ 0.0001 * |
| "                      | "                                    | respiratory               | 33% [26% - 51%]                      | 0.019      |
| "                      | "                                    | digestive                 | 32% [16% - 50%]                      | 0.00077 *  |
| "                      | "                                    | genitourinary             | 41% [30% - 57%]                      | 0.54       |
| "                      | "                                    | pregnancy complications   | 47% [37% - 60%]                      | 0.56       |
| "                      | "                                    | musculoskeletal           | 47% [33% - 58%]                      | 0.89       |
| "                      | "                                    | congenital anomalies      | 25% [18% - 43%]                      | 0.0012     |
| "                      | "                                    | symptoms                  | 46% [38% - 57%]                      | 0.59       |
| "                      | "                                    | injuries & poisonings     | 42% [32% - 55%]                      | 0.22       |
| musculoskeletal        | 47% [33% - 58%]                      | infectious diseases       | 40% [24% - 56%]                      | 0.26       |
| "                      | "                                    | neoplasms                 | 18% [11% - 33%]                      | ≤ 0.0001 * |
| "                      | "                                    | endocrine/metabolic       | 28% [19% - 44%]                      | ≤ 0.0001 * |
| "                      | "                                    | hematopoietic             | 35% [24% - 45%]                      | ≤ 0.0001 * |
| "                      | "                                    | mental disorders          | 35% [24% - 56%]                      | 0.0049     |
| "                      | "                                    | neurological              | 35% [22% - 48%]                      | 0.00083 *  |
| "                      | "                                    | sense organs              | 38% [27% - 50%]                      | 0.013      |
| "                      | "                                    | circulatory system        | 32% [24% - 43%]                      | ≤ 0.0001 * |
| "                      | "                                    | respiratory               | 33% [26% - 51%]                      | 0.006      |
| "                      | "                                    | digestive                 | 32% [16% - 50%]                      | 0.0002 *   |
| "                      | "                                    | genitourinary             | 41% [30% - 57%]                      | 0.33       |
| "                      | "                                    | pregnancy complications   | 47% [37% - 60%]                      | 0.48       |
| "                      | "                                    | dermatologic              | 48% [28% - 59%]                      | 0.89       |
| "                      | "                                    | congenital anomalies      | 25% [18% - 43%]                      | 0.00063 *  |
| "                      | "                                    | symptoms                  | 46% [38% - 57%]                      | 0.68       |
| "                      | "                                    | injuries & poisonings     | 42% [32% - 55%]                      | 0.13       |

|                      |                 |                         |                 |            |
|----------------------|-----------------|-------------------------|-----------------|------------|
| congenital anomalies | 25% [18% - 43%] | infectious diseases     | 40% [24% - 56%] | 0.057      |
| "                    | "               | neoplasms               | 18% [11% - 33%] | 0.0016     |
| "                    | "               | endocrine/metabolic     | 28% [19% - 44%] | 0.82       |
| "                    | "               | hematopoietic           | 35% [24% - 45%] | 0.98       |
| "                    | "               | mental disorders        | 35% [24% - 56%] | 0.29       |
| "                    | "               | neurological            | 35% [22% - 48%] | 0.41       |
| "                    | "               | sense organs            | 38% [27% - 50%] | 0.048      |
| "                    | "               | circulatory system      | 32% [24% - 43%] | 0.6        |
| "                    | "               | respiratory             | 33% [26% - 51%] | 0.12       |
| "                    | "               | digestive               | 32% [16% - 50%] | 0.48       |
| "                    | "               | genitourinary           | 41% [30% - 57%] | 0.003      |
| "                    | "               | pregnancy complications | 47% [37% - 60%] | 0.043      |
| "                    | "               | dermatologic            | 48% [28% - 59%] | 0.0012     |
| "                    | "               | musculoskeletal         | 47% [33% - 58%] | 0.00063 *  |
| "                    | "               | symptoms                | 46% [38% - 57%] | 0.0018     |
| "                    | "               | injuries & poisonings   | 42% [32% - 55%] | 0.038      |
| symptoms             | 46% [38% - 57%] | infectious diseases     | 40% [24% - 56%] | 0.16       |
| "                    | "               | neoplasms               | 18% [11% - 33%] | ≤ 0.0001 * |
| "                    | "               | endocrine/metabolic     | 28% [19% - 44%] | ≤ 0.0001 * |
| "                    | "               | hematopoietic           | 35% [24% - 45%] | 0.00015 *  |
| "                    | "               | mental disorders        | 35% [24% - 56%] | 0.0052     |
| "                    | "               | neurological            | 35% [22% - 48%] | 0.0016     |
| "                    | "               | sense organs            | 38% [27% - 50%] | 0.015      |
| "                    | "               | circulatory system      | 32% [24% - 43%] | ≤ 0.0001 * |
| "                    | "               | respiratory             | 33% [26% - 51%] | 0.0049     |
| "                    | "               | digestive               | 32% [16% - 50%] | 0.001      |
| "                    | "               | genitourinary           | 41% [30% - 57%] | 0.21       |
| "                    | "               | pregnancy complications | 47% [37% - 60%] | 0.34       |
| "                    | "               | dermatologic            | 48% [28% - 59%] | 0.59       |
| "                    | "               | musculoskeletal         | 47% [33% - 58%] | 0.68       |
| "                    | "               | congenital anomalies    | 25% [18% - 43%] | 0.0018     |
| "                    | "               | injuries & poisonings   | 42% [32% - 55%] | 0.1        |

\*  $p < 0.001$

**Table S5. PheWAS summary under naive post-acute phenotyping: top 100 associations.**

| <b>Phecode</b> | <b>Description</b>                                                             | <b>Odds Ratio (95% CI)</b> | <b>p value</b> | <b>No. cases</b> | <b>No. controls</b> |
|----------------|--------------------------------------------------------------------------------|----------------------------|----------------|------------------|---------------------|
| 585.1          | Acute renal failure                                                            | 5.72 (4.91-6.68)           | 5.07E-109      | 1,054            | 183,082             |
| 427.5          | Arrhythmia (cardiac) NOS                                                       | 6.85 (5.67-8.26)           | 1.92E-89       | 632              | 178,215             |
| 292.4          | Altered mental status                                                          | 12.5 (9.55-16.3)           | 8.91E-77       | 258              | 187,128             |
| 418.1          | Precordial pain                                                                | 4.10 (3.53-4.77)           | 8.73E-75       | 1,034            | 183,404             |
| 285.1          | Acute posthemorrhagic anemia                                                   | 16.3 (12.0-22.0)           | 5.43E-73       | 189              | 183,114             |
| 458.9          | Hypotension NOS                                                                | 10.3 (7.96-13.4)           | 5.54E-70       | 274              | 189,734             |
| 401.1          | Essential hypertension                                                         | 1.63 (1.54-1.72)           | 5.60E-68       | 15,711           | 163,382             |
| 401.22         | Hypertensive chronic kidney disease                                            | 6.19 (5.03-7.62)           | 1.16E-66       | 738              | 163,382             |
| 285            | Other anemias                                                                  | 3.37 (2.93-3.87)           | 6.74E-65       | 1,443            | 183,114             |
| 509.1          | Respiratory failure                                                            | 5.07 (4.17-6.16)           | 7.60E-60       | 600              | 188,161             |
| 994.2          | Sepsis                                                                         | 11.5 (8.50-15.7)           | 2.06E-55       | 196              | 191,158             |
| 1013           | Asphyxia and hypoxemia                                                         | 9.14 (6.93-12.1)           | 2.78E-55       | 240              | 190,957             |
| 348.8          | Encephalopathy, not elsewhere classified                                       | 14.6 (10.4-20.4)           | 5.97E-55       | 157              | 184,955             |
| 38             | Septicemia                                                                     | 12.6 (9.16-17.4)           | 7.00E-54       | 176              | 188,677             |
| 772.3          | Muscle weakness                                                                | 5.01 (4.08-6.15)           | 9.28E-54       | 536              | 188,033             |
| 272.1          | Hyperlipidemia                                                                 | 2.29 (2.06-2.55)           | 7.06E-53       | 3,137            | 171,670             |
| 276.6          | Fluid overload                                                                 | 8.37 (6.29-11.1)           | 2.65E-48       | 245              | 186,845             |
| 512.9          | Other dyspnea                                                                  | 2.47 (2.18-2.79)           | 1.44E-46       | 1,835            | 171,917             |
| 649            | Conditions of the mother complicating pregnancy, childbirth, or the puerperium | 5.25 (4.18-6.59)           | 2.00E-46       | 368              | 108,651             |
| 276.41         | Acidosis                                                                       | 4.87 (3.91-6.05)           | 6.44E-46       | 513              | 186,845             |
| 338.1          | Acute pain                                                                     | 2.64 (2.30-3.02)           | 1.07E-43       | 1,652            | 177,888             |
| 512.7          | Shortness of breath                                                            | 1.95 (1.78-2.15)           | 1.43E-42       | 3,451            | 171,917             |
| 250.22         | Type 2 diabetes with renal manifestations                                      | 3.47 (2.90-4.15)           | 8.98E-42       | 1,181            | 177,510             |
| 38.3           | Bacteremia                                                                     | 15.1 (10.2-22.4)           | 1.11E-41       | 118              | 188,677             |
| 276.5          | Hypovolemia                                                                    | 6.93 (5.23-9.17)           | 1.20E-41       | 261              | 186,845             |
| 276.12         | Hyposmolality and/or hyponatremia                                              | 4.89 (3.88-6.17)           | 3.26E-41       | 433              | 186,845             |
| 278.11         | Morbid obesity                                                                 | 2.10 (1.88-2.35)           | 2.05E-39       | 2,335            | 182,589             |
| 260.2          | Severe protein-calorie malnutrition                                            | 7.91 (5.81-10.8)           | 2.68E-39       | 212              | 183,599             |
| 530.11         | GERD                                                                           | 1.89 (1.72-2.08)           | 6.32E-39       | 3,958            | 178,019             |
| 418            | Nonspecific chest pain                                                         | 2.09 (1.87-2.35)           | 1.32E-37       | 2,264            | 183,404             |
| 250.2          | Type 2 diabetes                                                                | 1.85 (1.68-2.04)           | 1.78E-36       | 5,316            | 177,510             |
| 401.2          | Hypertensive heart and/or renal disease                                        | 6.69 (4.98-9.01)           | 3.48E-36       | 373              | 163,382             |
| 585.3          | Chronic renal failure [CKD]                                                    | 3.57 (2.91-4.38)           | 1.94E-34       | 787              | 183,082             |
| 276.13         | Hyperpotassemia                                                                | 3.56 (2.90-4.38)           | 1.63E-33       | 621              | 186,845             |
| 1010.6         | Reproductive and maternal health services                                      | 2.08 (1.84-2.35)           | 2.25E-32       | 1,598            | 189,380             |
| 285.21         | Anemia in chronic kidney disease                                               | 3.64 (2.94-4.52)           | 3.35E-32       | 629              | 183,114             |
| 428.1          | Congestive heart failure (CHF) NOS                                             | 4.48 (3.49-5.75)           | 6.83E-32       | 427              | 184,871             |
| 401.21         | Hypertensive heart disease                                                     | 3.63 (2.92-4.52)           | 3.78E-31       | 701              | 163,382             |
| 288.2          | Elevated white blood cell count                                                | 4.41 (3.43-5.67)           | 8.23E-31       | 344              | 187,148             |
| 509.8          | Dependence on respirator [Ventilator] or supplemental oxygen                   | 7.42 (5.24-10.5)           | 1.37E-29       | 160              | 188,161             |
| 665            | Obstetrical/birth trauma                                                       | 7.96 (5.54-11.4)           | 2.50E-29       | 152              | 191,347             |
| 411.2          | Myocardial infarction                                                          | 3.44 (2.75-4.31)           | 5.97E-27       | 607              | 182,562             |
| 327.32         | Obstructive sleep apnea                                                        | 1.75 (1.58-1.94)           | 7.65E-27       | 3,401            | 179,431             |
| 508            | Pulmonary collapse; interstitial and compensatory emphysema                    | 6.58 (4.66-9.29)           | 8.33E-27       | 176              | 188,161             |
| 426            | Cardiac conduction disorders                                                   | 9.15 (5.95-14.1)           | 6.94E-24       | 106              | 178,215             |
| 591            | Urinary tract infection                                                        | 2.29 (1.95-2.69)           | 1.75E-23       | 1,145            | 184,472             |
| 798            | Malaise and fatigue                                                            | 1.63 (1.48-1.80)           | 2.00E-23       | 3,445            | 178,495             |
| 276.14         | Hypopotassemia                                                                 | 3.36 (2.65-4.27)           | 2.91E-23       | 466              | 186,845             |
| 260.3          | Adult failure to thrive                                                        | 8.99 (5.81-13.9)           | 5.90E-23       | 101              | 183,599             |
| 789            | Nausea and vomiting                                                            | 1.83 (1.62-2.07)           | 1.44E-22       | 2,139            | 184,375             |
| 994.21         | Septic shock                                                                   | 18.0 (10.1-32.4)           | 2.70E-22       | 53               | 191,158             |

|        |                                                                                                        |                  |          |       |         |
|--------|--------------------------------------------------------------------------------------------------------|------------------|----------|-------|---------|
| 797    | Shock                                                                                                  | 16.2 (9.16-28.5) | 7.79E-22 | 55    | 191,476 |
| 297.1  | Suicidal ideation                                                                                      | 5.50 (3.89-7.80) | 7.90E-22 | 192   | 170,204 |
| 655    | Known or suspected fetal abnormality affecting management of mother                                    | 3.41 (2.65-4.38) | 1.15E-21 | 310   | 108,936 |
| 272.11 | Hypercholesterolemia                                                                                   | 1.82 (1.61-2.06) | 1.24E-21 | 2,281 | 171,670 |
| 244.4  | Hypothyroidism NOS                                                                                     | 1.69 (1.51-1.88) | 4.88E-21 | 2,802 | 182,090 |
| 250.24 | Type 2 diabetes with neurological manifestations                                                       | 2.29 (1.93-2.73) | 5.53E-21 | 1,344 | 177,510 |
| 1010   | Other tests                                                                                            | 3.50 (2.69-4.56) | 1.08E-20 | 308   | 189,547 |
| 427.7  | Tachycardia NOS                                                                                        | 2.55 (2.10-3.11) | 1.41E-20 | 663   | 178,215 |
| 646    | Other complications of pregnancy NEC                                                                   | 5.10 (3.60-7.22) | 3.68E-20 | 160   | 109,219 |
| 278.1  | Obesity                                                                                                | 1.90 (1.66-2.18) | 3.98E-20 | 1,549 | 182,589 |
| 644    | Anemia during pregnancy                                                                                | 10.0 (6.09-16.6) | 1.62E-19 | 73    | 109,431 |
| 274.1  | Gout                                                                                                   | 3.25 (2.51-4.21) | 3.73E-19 | 351   | 189,924 |
| 654.1  | Abnormality of organs and soft tissues of pelvis complicating pregnancy, childbirth, or the puerperium | 4.04 (2.97-5.50) | 5.69E-19 | 209   | 108,966 |
| 136    | Other infectious and parasitic diseases                                                                | 6.74 (4.41-10.3) | 1.17E-18 | 104   | 191,038 |
| 428.4  | Heart failure with preserved EF [Diastolic heart failure]                                              | 2.39 (1.96-2.91) | 7.53E-18 | 1,167 | 184,871 |
| 663    | Umbilical cord complications during labor and delivery                                                 | 21.8 (10.8-44.1) | 1.02E-17 | 44    | 191,521 |
| 638    | Other high-risk pregnancy                                                                              | 2.38 (1.95-2.90) | 1.06E-17 | 584   | 190,705 |
| 290.2  | Delirium due to conditions classified elsewhere                                                        | 20.4 (10.2-40.6) | 1.07E-17 | 37    | 187,128 |
| 411.4  | Coronary atherosclerosis                                                                               | 1.60 (1.44-1.79) | 2.26E-17 | 4,362 | 182,562 |
| 585.32 | End stage renal disease                                                                                | 2.69 (2.14-3.38) | 2.37E-17 | 722   | 183,082 |
| 588.1  | Renal osteodystrophy                                                                                   | 3.12 (2.39-4.06) | 3.32E-17 | 456   | 183,082 |
| 427.21 | Atrial fibrillation                                                                                    | 1.71 (1.51-1.94) | 5.90E-17 | 3,184 | 178,215 |
| 284.1  | Pancytopenia                                                                                           | 3.94 (2.85-5.45) | 1.01E-16 | 256   | 183,114 |
| 785    | Abdominal pain                                                                                         | 1.42 (1.31-1.54) | 1.27E-16 | 5,027 | 180,428 |
| 452.2  | Deep vein thrombosis [DVT]                                                                             | 2.57 (2.05-3.21) | 1.63E-16 | 569   | 185,983 |
| 480    | Pneumonia                                                                                              | 2.83 (2.21-3.63) | 1.81E-16 | 387   | 188,133 |
| 653    | Problems associated with amniotic cavity and membranes                                                 | 13.4 (7.22-24.8) | 1.86E-16 | 48    | 108,966 |
| 585.34 | Chronic Kidney Disease, Stage IV                                                                       | 2.91 (2.26-3.76) | 2.25E-16 | 537   | 183,082 |
| 590    | Pyelonephritis                                                                                         | 5.81 (3.81-8.86) | 2.95E-16 | 113   | 184,472 |
| 851    | Complications of transplants and reattached limbs                                                      | 2.38 (1.94-2.94) | 3.18E-16 | 788   | 187,602 |
| 287.3  | Thrombocytopenia                                                                                       | 2.99 (2.30-3.90) | 5.75E-16 | 382   | 188,946 |
| 507    | Pleurisy; pleural effusion                                                                             | 3.24 (2.43-4.31) | 7.34E-16 | 351   | 188,161 |
| 280.1  | Iron deficiency anemias, unspecified or not due to blood loss                                          | 1.91 (1.63-2.24) | 1.36E-15 | 1,330 | 183,114 |
| 578.9  | Hemorrhage of gastrointestinal tract                                                                   | 5.45 (3.59-8.29) | 2.10E-15 | 123   | 188,746 |
| 260    | Protein-calorie malnutrition                                                                           | 3.39 (2.50-4.58) | 2.90E-15 | 302   | 183,599 |
| 41     | Bacterial infection NOS                                                                                | 3.15 (2.36-4.21) | 5.79E-15 | 288   | 188,677 |
| 359.2  | Myopathy                                                                                               | 8.12 (4.79-13.8) | 7.43E-15 | 71    | 188,619 |
| 285.2  | Anemia of chronic disease                                                                              | 6.90 (4.24-11.2) | 8.32E-15 | 89    | 183,114 |
| 250.42 | Other abnormal glucose                                                                                 | 2.16 (1.78-2.63) | 8.87E-15 | 805   | 177,510 |
| 272.13 | Mixed hyperlipidemia                                                                                   | 1.44 (1.31-1.58) | 8.95E-15 | 5,236 | 171,670 |
| 38.2   | Gram positive septicemia                                                                               | 16.5 (8.08-33.7) | 1.43E-14 | 36    | 188,677 |
| 41.4   | E. coli                                                                                                | 13.3 (6.86-25.9) | 2.25E-14 | 41    | 188,677 |
| 41.9   | Infection with drug-resistant microorganisms                                                           | 15.1 (7.53-30.3) | 2.26E-14 | 37    | 188,677 |
| 1090   | Acquired absence of organs                                                                             | 2.55 (2.00-3.24) | 2.80E-14 | 569   | 189,321 |
| 642    | Hypertension complicating pregnancy, childbirth, and the puerperium                                    | 5.51 (3.53-8.61) | 6.49E-14 | 93    | 109,399 |
| 567    | Peritonitis and retroperitoneal infections                                                             | 4.84 (3.20-7.32) | 8.48E-14 | 135   | 187,178 |
| 276.11 | Hyperosmolality and/or hypernatremia                                                                   | 34.2 (13.4-87.6) | 1.65E-13 | 22    | 186,845 |
| 532    | Dysphagia                                                                                              | 1.84 (1.56-2.16) | 4.40E-13 | 1,445 | 178,019 |

**Table S6. Temporal-informed PheWAS by race/ethnicity subgroups.**

| <b>White, Non-Hispanic patients (N=125,938)</b> |                                                                                |                   |               |                |                  |                     |
|-------------------------------------------------|--------------------------------------------------------------------------------|-------------------|---------------|----------------|------------------|---------------------|
| <b>Phecode<sup>a</sup></b>                      | <b>Description</b>                                                             | <b>Odds Ratio</b> | <b>95% CI</b> | <b>p value</b> | <b>No. cases</b> | <b>No. controls</b> |
| 512.9                                           | Other dyspnea                                                                  | 3.22              | (2.59-4.00)   | 7.73E-26       | 627              | 59,636              |
| 512.7                                           | Shortness of breath                                                            | 2.81              | (2.29-3.44)   | 1.66E-23       | 760              | 59,636              |
| 359.2                                           | Myopathy                                                                       | 29.9              | (12.2-73.3)   | 1.26E-13       | 25               | 113,531             |
| 427.9                                           | Palpitations                                                                   | 2.35              | (1.85-2.97)   | 1.26E-12       | 468              | 84,577              |
| 569.2                                           | Gastrointestinal complications of surgery                                      | 5.69              | (3.48-9.30)   | 3.93E-12       | 85               | 107,583             |
| 418.1                                           | Precordial pain                                                                | 3.78              | (2.59-5.52)   | 5.31E-12       | 194              | 87,353              |
| 278.11                                          | Morbid obesity                                                                 | 2.32              | (1.82-2.96)   | 1.08E-11       | 437              | 100,068             |
| 136                                             | Other infectious and parasitic diseases                                        | 11.4              | (5.65-23.0)   | 1.14E-11       | 38               | 119,882             |
| 509.1                                           | Respiratory failure                                                            | 6.32              | (3.66-10.9)   | 3.92E-11       | 86               | 100,780             |
| 649                                             | Conditions of the mother complicating pregnancy, childbirth, or the puerperium | 3.77              | (2.53-5.62)   | 6.23E-11       | 124              | 63,357              |
| 427.21                                          | Atrial fibrillation                                                            | 2.67              | (1.95-3.64)   | 6.86E-10       | 382              | 84,577              |
| 585.1                                           | Acute renal failure                                                            | 3.25              | (2.18-4.86)   | 8.87E-09       | 218              | 100,977             |
| 327.32                                          | Obstructive sleep apnea                                                        | 2.05              | (1.60-2.62)   | 1.14E-08       | 526              | 94,165              |
| 418                                             | Nonspecific chest pain                                                         | 1.97              | (1.55-2.50)   | 2.52E-08       | 530              | 87,353              |
| 782.3                                           | Edema                                                                          | 2.27              | (1.67-3.08)   | 1.78E-07       | 331              | 108,722             |
| 1010                                            | Other tests                                                                    | 3.26              | (2.09-5.11)   | 2.23E-07       | 111              | 110,956             |
| 250.2                                           | Type 2 diabetes                                                                | 2.13              | (1.60-2.84)   | 2.41E-07       | 406              | 93,983              |
| 599.2                                           | Retention of urine                                                             | 3.39              | (2.13-5.41)   | 2.95E-07       | 148              | 94,495              |
| 1013                                            | Asphyxia and hypoxemia                                                         | 6.28              | (3.11-12.7)   | 3.09E-07       | 43               | 114,386             |
| 350.1                                           | Abnormal involuntary movements                                                 | 2.55              | (1.76-3.69)   | 6.66E-07       | 205              | 111,360             |
| 249                                             | Secondary diabetes mellitus                                                    | 8.71              | (3.62-21.0)   | 1.39E-06       | 44               | 93,983              |
| 452.2                                           | Deep vein thrombosis [DVT]                                                     | 3.45              | (2.08-5.74)   | 1.76E-06       | 105              | 104,177             |
| 452                                             | Other venous embolism and thrombosis                                           | 4.49              | (2.41-8.37)   | 2.22E-06       | 68               | 104,177             |
| 420.1                                           | Myocarditis                                                                    | 11.4              | (4.05-31.9)   | 3.84E-06       | 17               | 115,711             |
| 292                                             | Neurological disorders                                                         | 2.47              | (1.68-3.62)   | 3.90E-06       | 188              | 104,296             |
| 514                                             | Abnormal findings examination of lungs                                         | 2.42              | (1.66-3.53)   | 4.80E-06       | 284              | 105,200             |
| 646                                             | Other complications of pregnancy NEC                                           | 4.09              | (2.22-7.51)   | 5.71E-06       | 50               | 65,813              |
| 1010.6                                          | Reproductive and maternal health services                                      | 1.71              | (1.35-2.17)   | 8.43E-06       | 408              | 114,589             |
| 284.1                                           | Pancytopenia                                                                   | 3.91              | (2.11-7.22)   | 1.38E-05       | 73               | 94,032              |
| 727.1                                           | Synovitis and tenosynovitis                                                    | 2.31              | (1.58-3.37)   | 1.47E-05       | 212              | 92,564              |
| 386.9                                           | Dizziness and giddiness                                                        | 1.74              | (1.35-2.25)   | 1.69E-05       | 489              | 103,688             |
| 781                                             | Symptoms involving nervous and musculoskeletal systems                         | 3.01              | (1.82-4.98)   | 1.83E-05       | 117              | 117,833             |
| 433.1                                           | Occlusion and stenosis of precerebral arteries                                 | 3.66              | (1.99-6.73)   | 3.16E-05       | 83               | 111,257             |
| 401.1                                           | Essential hypertension                                                         | 1.45              | (1.22-1.73)   | 3.38E-05       | 1,268            | 74,057              |
| 285.2                                           | Anemia of chronic disease                                                      | 11.0              | (3.53-34.2)   | 3.54E-05       | 17               | 94,032              |
| 649.1                                           | Diabetes or abnormal glucose tolerance complicating pregnancy                  | 4.61              | (2.21-9.61)   | 4.58E-05       | 36               | 63,357              |
| <b>Black, Non-Hispanic patients (N=19,936)</b>  |                                                                                |                   |               |                |                  |                     |
| 798.1                                           | Chronic fatigue syndrome                                                       | 7.63              | (3.39-17.2)   | 8.98E-07       | 29               | 12,789              |
| 569.2                                           | Gastrointestinal complications of surgery                                      | 8.13              | (3.50-18.9)   | 1.07E-06       | 24               | 16,681              |
| 278.11                                          | Morbid obesity                                                                 | 2.95              | (1.87-4.65)   | 3.43E-06       | 106              | 13,894              |
| 638                                             | Other high-risk pregnancy                                                      | 4.38              | (2.19-8.78)   | 3.07E-05       | 37               | 18,235              |
| 250.42                                          | Other abnormal glucose                                                         | 4.76              | (2.23-10.1)   | 5.51E-05       | 42               | 13,745              |
| 280.2                                           | Iron deficiency anemia secondary to blood loss                                 | 5.08              | (2.20-11.7)   | 1.39E-04       | 28               | 12,275              |

<sup>a</sup> A list of ICD-10-CM codes included in each phecode is available at: [https://phewascalog.org/phecodes\\_icd10cm](https://phewascalog.org/phecodes_icd10cm) [10]

**Table S7. Temporal-informed PheWAS by sex.**

| <b>Temporal-informed PheWAS among both male and female patients.</b> |                        |                   |               |                        |                  |                     |                   |               |                        |                  |                     |
|----------------------------------------------------------------------|------------------------|-------------------|---------------|------------------------|------------------|---------------------|-------------------|---------------|------------------------|------------------|---------------------|
|                                                                      |                        | <b>Females</b>    |               |                        |                  |                     | <b>Males</b>      |               |                        |                  |                     |
| <b>Phenotype</b>                                                     | <b>Description</b>     | <b>Odds Ratio</b> | <b>95% CI</b> | <b>p value</b>         | <b>No. cases</b> | <b>No. controls</b> | <b>Odds Ratio</b> | <b>95% CI</b> | <b>p value</b>         | <b>No. cases</b> | <b>No. controls</b> |
| 512.9                                                                | Other dyspnea          | 2.75              | (2.13-3.55)   | $9.38 \times 10^{-15}$ | 456              | 52,865              | 3.46              | (2.61-4.58)   | $6.56 \times 10^{-18}$ | 355              | 41,071              |
| 512.7                                                                | Shortness of breath    | 2.24              | (1.79-2.82)   | $3.35 \times 10^{-12}$ | 597              | 52,865              | 2.94              | (2.22-3.88)   | $3.81 \times 10^{-14}$ | 391              | 41,071              |
| 278.11                                                               | Morbid obesity         | 2.29              | (1.82-2.87)   | $1.06 \times 10^{-12}$ | 464              | 85,699              | 2.50              | (1.7-3.69)    | $3.76 \times 10^{-06}$ | 160              | 69,162              |
| 359.2                                                                | Myopathy               | 25.2              | (7.23-88.2)   | $4.18 \times 10^{-07}$ | 15               | 100,096             | 18.0              | (6.24-51.9)   | $8.97 \times 10^{-08}$ | 18               | 74,767              |
| 418.1                                                                | Precordial pain        | 2.99              | (2-4.47)      | $8.81 \times 10^{-08}$ | 174              | 79,908              | 3.66              | (2.2-6.07)    | $5.16 \times 10^{-07}$ | 104              | 58,629              |
| 418                                                                  | Nonspecific chest pain | 1.93              | (1.51-2.47)   | $1.46 \times 10^{-07}$ | 444              | 79,908              | 2.13              | (1.56-2.9)    | $1.84 \times 10^{-06}$ | 302              | 58,629              |
| 585.1                                                                | Acute renal failure    | 3.61              | (2.27-5.76)   | $6.15 \times 10^{-08}$ | 151              | 92,868              | 2.76              | (1.72-4.42)   | $2.47 \times 10^{-05}$ | 158              | 64,607              |

| <b>Temporal-informed PheWAS among female patients only.</b> |                                                                                |                   |               |                        |                  |                     |                   |               |                |                  |                     |
|-------------------------------------------------------------|--------------------------------------------------------------------------------|-------------------|---------------|------------------------|------------------|---------------------|-------------------|---------------|----------------|------------------|---------------------|
|                                                             |                                                                                | <b>Females</b>    |               |                        |                  |                     | <b>Males</b>      |               |                |                  |                     |
| <b>Phenotype</b>                                            | <b>Description</b>                                                             | <b>Odds Ratio</b> | <b>95% CI</b> | <b>p value</b>         | <b>No. cases</b> | <b>No. controls</b> | <b>Odds Ratio</b> | <b>95% CI</b> | <b>p value</b> | <b>No. cases</b> | <b>No. controls</b> |
| 569.2                                                       | Gastrointestinal complications                                                 | 6.54              | (4.24-10.1)   | $2.51 \times 10^{-17}$ | 94               | 95,244              | 5.78              | (1.96-17)     | 0.0014         | 22               | 71,581              |
| 136                                                         | Other infectious and parasitic diseases                                        | 16.0              | (7.57-33.7)   | $3.55 \times 10^{-13}$ | 35               | 103,699             | 3.33              | (1.19-9.26)   | 0.0214         | 19               | 78,267              |
| 427.9                                                       | Palpitations                                                                   | 2.35              | (1.86-2.97)   | $1.07 \times 10^{-12}$ | 441              | 80,047              | 1.67              | (1.12-2.47)   | 0.011          | 187              | 57,039              |
| 649                                                         | Conditions of the mother complicating pregnancy, childbirth, or the puerperium | 2.94              | (2.15-4.03)   | $1.71 \times 10^{-11}$ | 169              | 95,518              | -                 | -             | -              | -                | -                   |
| 646                                                         | Other complications of pregnancy NEC                                           | 4.27              | (2.66-6.86)   | $2.06 \times 10^{-09}$ | 69               | 99,542              | -                 | -             | -              | -                | -                   |
| 1010.6                                                      | Reproductive and maternal health services                                      | 1.75              | (1.44-2.12)   | $9.99 \times 10^{-09}$ | 591              | 92,952              | -                 | -             | -              | -                | -                   |
| 638                                                         | Other high-risk pregnancy                                                      | 2.19              | (1.67-2.86)   | $1.34 \times 10^{-08}$ | 312              | 98,919              | -                 | -             | -              | -                | -                   |
| 1010                                                        | Other tests                                                                    | 3.19              | (2.09-4.86)   | $7.43 \times 10^{-08}$ | 116              | 92,964              | 2.7               | (1.22-5.95)   | 0.014          | 39               | 76,383              |
| 420.1                                                       | Myocarditis                                                                    | 16.1              | (5.52-47)     | $3.67 \times 10^{-07}$ | 15               | 102,140             | -                 | -             | -              | 5                | 74,863              |
| 401.1                                                       | Essential hypertension                                                         | 1.63              | (1.34-1.98)   | $1.01 \times 10^{-06}$ | 865              | 74,906              | 1.22              | (0.98-1.52)   | 0.0725         | 833              | 48,001              |
| 644                                                         | Anemia during pregnancy                                                        | 4.72              | (2.5-8.92)    | $1.81 \times 10^{-06}$ | 38               | 101,761             | -                 | -             | -              | -                | -                   |
| 452.2                                                       | Deep vein thrombosis [DVT]                                                     | 4.37              | (2.38-8.03)   | $1.96 \times 10^{-06}$ | 66               | 93,371              | 2.37              | (1.27-4.44)   | 0.007          | 72               | 69,340              |
| 285                                                         | Other anemias                                                                  | 2.34              | (1.64-3.32)   | $2.21 \times 10^{-06}$ | 259              | 82,899              | 1.69              | (1.11-2.58)   | 0.0149         | 214              | 63,606              |
| 649.1                                                       | Diabetes or abnormal glucose tolerance complicating pregnancy                  | 3.52              | (2.08-5.98)   | $3.11 \times 10^{-06}$ | 57               | 95,518              | -                 | -             | -              | -                | -                   |
| 292                                                         | Neurological disorders                                                         | 2.70              | (1.76-4.14)   | $5.11 \times 10^{-06}$ | 135              | 93,719              | 2.01              | (1.2-3.37)    | 0.00826        | 107              | 68,515              |



|       |                                                                               |      |             |                        |     |         |      |             |         |     |        |
|-------|-------------------------------------------------------------------------------|------|-------------|------------------------|-----|---------|------|-------------|---------|-----|--------|
| 671   | Venous/cerebrovascular complications embolism in pregnancy and the puerperium | 9.77 | (3.61-26.4) | $7.09 \times 10^{-06}$ | 17  | 103,586 | -    | -           | -       | -   | -      |
| 782.3 | Edema                                                                         | 2.25 | (1.57-3.22) | $9.51 \times 10^{-06}$ | 231 | 95,466  | 1.91 | (1.27-2.88) | 0.00182 | 193 | 72,718 |
| 348.8 | Encephalopathy, not elsewhere classified                                      | 12.1 | (3.95-37.1) | $1.27 \times 10^{-05}$ | 17  | 92,273  | 3.40 | (0.91-12.7) | 0.0694  | 15  | 68,246 |
| 284.1 | Pancytopenia                                                                  | 5.01 | (2.42-10.4) | $1.45 \times 10^{-05}$ | 46  | 82,899  | 2.02 | (0.84-4.84) | 0.114   | 48  | 63,606 |

**Temporal-informed PheWAS among male patients only.**

|           |                                        | Females    |             |         |           |              | Males      |             |                        |           |              |
|-----------|----------------------------------------|------------|-------------|---------|-----------|--------------|------------|-------------|------------------------|-----------|--------------|
| Phenotype | Description                            | Odds Ratio | 95% CI      | p value | No. cases | No. controls | Odds Ratio | 95% CI      | p value                | No. cases | No. controls |
| 509.1     | Respiratory failure                    | 3.23       | (1.45-7.17) | 0.00401 | 50        | 93,041       | 12.4       | (6.53-23.5) | $1.27 \times 10^{-14}$ | 51        | 64,751       |
| 427.21    | Atrial fibrillation                    | 1.96       | (1.23-3.13) | 0.00462 | 170       | 80,047       | 3.27       | (2.28-4.68) | $9.13 \times 10^{-11}$ | 273       | 57,039       |
| 840       | Sprains and strains                    | 1.10       | (0.80-1.51) | 0.57    | 348       | 91,895       | 2.28       | (1.64-3.18) | $1.08 \times 10^{-06}$ | 249       | 69,749       |
| 514       | Abnormal findings examination of lungs | 1.76       | (1.09-2.82) | 0.02    | 183       | 95,645       | 3.12       | (1.95-5)    | $2.04 \times 10^{-06}$ | 167       | 67,924       |
| 278.1     | Obesity                                | 1.41       | (1.07-1.85) | 0.015   | 401       | 85,699       | 2.41       | (1.65-3.51) | $5.73 \times 10^{-06}$ | 165       | 69,162       |
| 350.1     | Abnormal involuntary movements         | 2.22       | (1.44-3.43) | 0.0003  | 149       | 96,901       | 2.99       | (1.85-4.84) | $8.5 \times 10^{-06}$  | 107       | 73,586       |
| 1013      | Asphyxia and hypoxemia                 | 4.40       | (1.73-11.2) | 0.002   | 27        | 101,438      | 7.13       | (2.89-17.6) | $1.98 \times 10^{-05}$ | 25        | 74,001       |
| 295.1     | Schizophrenia                          | -          | -           | -       | 9         | 66,054       | 6.71       | (2.67-16.9) | $5.13 \times 10^{-05}$ | 26        | 58,256       |

**Table S8. Temporal-informed PheWAS by onset of diagnosis.**

| Phenotype | Description                                                                    | Early-presenting post-acute phenotypes <sup>a</sup> |             |          |           |              | Late-presenting post-acute phenotypes <sup>b</sup> |             |          |           |              |
|-----------|--------------------------------------------------------------------------------|-----------------------------------------------------|-------------|----------|-----------|--------------|----------------------------------------------------|-------------|----------|-----------|--------------|
|           |                                                                                | Odds Ratio                                          | 95% CI      | p value  | No. cases | No. controls | Odds Ratio                                         | 95% CI      | p value  | No. cases | No. controls |
| 512.9     | Other dyspnea                                                                  | 3.89                                                | (2.80-5.41) | 7.14E-16 | 227       | 96,877       | 2.79                                               | (2.22-3.51) | 1.13E-18 | 584       | 90,181       |
| 569.2     | Gastrointestinal complications                                                 | 9.81                                                | (5.21-18.5) | 1.62E-12 | 44        | 167,795      | 5.11                                               | (3.06-8.53) | 4.31E-10 | 72        | 160,967      |
| 509.1     | Respiratory failure                                                            | 12.8                                                | (6.24-26.2) | 3.25E-12 | 43        | 158,293      | 4.42                                               | (2.22-8.82) | 2.38E-05 | 58        | 152,379      |
| 427.9     | Palpitations                                                                   | 3.02                                                | (2.11-4.32) | 1.68E-09 | 172       | 138,826      | 1.86                                               | (1.46-2.37) | 6.56E-07 | 456       | 132,806      |
| 512.7     | Shortness of breath                                                            | 2.52                                                | (1.86-3.42) | 2.83E-09 | 292       | 96,877       | 2.52                                               | (2.03-3.11) | 2.05E-17 | 696       | 90,181       |
| 644       | Anemia during pregnancy                                                        | 19.0                                                | (6.26-57.4) | 1.97E-07 | 16        | 101,815      | -                                                  | -           | -        | -         | -            |
| 514       | Abnormal findings examination of lungs                                         | 3.47                                                | (2.06-5.85) | 2.84E-06 | 113       | 164,532      | -                                                  | -           | -        | -         | -            |
| 285       | Other anemias                                                                  | 2.83                                                | (1.83-4.39) | 3.41E-06 | 157       | 147,698      | -                                                  | -           | -        | -         | -            |
| 418.1     | Precordial pain                                                                | 4.42                                                | (2.34-8.37) | 4.74E-06 | 56        | 140,112      | 2.94                                               | (2.05-4.21) | 4.7E-09  | 222       | 134,057      |
| 136       | Other infectious and parasitic diseases                                        | 11.9                                                | (3.81-37.1) | 2.03E-05 | 15        | 182,227      | 8.46                                               | (4.26-16.8) | 1.03E-09 | 39        | 175,181      |
| 585.1     | Acute renal failure                                                            | 3.24                                                | (1.84-5.69) | 4.69E-05 | 107       | 158,429      | 3.26                                               | (2.19-4.85) | 5.22E-09 | 202       | 152,145      |
| 359.2     | Myopathy                                                                       | 12.7                                                | (3.74-43.5) | 4.78E-05 | 16        | 175,579      | 28.1                                               | (9.94-79.6) | 3.23E-10 | 17        | 168,524      |
| 452       | Other venous embolism and thrombosis                                           | 5.49                                                | (2.36-12.7) | 7.37E-05 | 32        | 164,545      | -                                                  | -           | -        | -         | -            |
| 401.1     | Essential hypertension                                                         | 1.62                                                | (1.27-2.06) | 9.52E-05 | 617       | 124,813      | -                                                  | -           | -        | -         | -            |
| 278.11    | Morbid obesity                                                                 | -                                                   | -           | -        | -         | -            | 2.49                                               | (1.98-3.14) | 9.64E-15 | 443       | 149,748      |
| 649       | Conditions of the mother complicating pregnancy, childbirth, or the puerperium | -                                                   | -           | -        | -         | -            | 3.66                                               | (2.54-5.27) | 3.26E-12 | 145       | 92,130       |
| 427.21    | Atrial fibrillation                                                            | -                                                   | -           | -        | -         | -            | 3.23                                               | (2.30-4.56) | 1.88E-11 | 263       | 132,806      |
| 418       | Nonspecific chest pain                                                         | -                                                   | -           | -        | -         | -            | 1.99                                               | (1.59-2.49) | 1.41E-09 | 566       | 134,057      |
| 292       | Neurological disorders                                                         | -                                                   | -           | -        | -         | -            | 2.97                                               | (2.09-4.22) | 1.51E-09 | 192       | 156,592      |
| 646       | Other complications of pregnancy NEC                                           | -                                                   | -           | -        | -         | -            | 5.06                                               | (2.86-8.93) | 2.3E-08  | 55        | 95,983       |
| 1010      | Other tests                                                                    | -                                                   | -           | -        | -         | -            | 3.23                                               | (2.11-4.94) | 7.01E-08 | 121       | 163,187      |
| 638       | Other high-risk pregnancy                                                      | -                                                   | -           | -        | -         | -            | 2.23                                               | (1.66-2.98) | 8.46E-08 | 269       | 172,113      |
| 395.6     | Heart valve replaced                                                           | -                                                   | -           | -        | -         | -            | 11.0                                               | (4.43-27.5) | 2.53E-07 | 23        | 160,821      |
| 1010.6    | Reproductive and maternal health services                                      | -                                                   | -           | -        | -         | -            | 1.74                                               | (1.41-2.15) | 2.55E-07 | 496       | 166,455      |
| 350.1     | Abnormal involuntary movements                                                 | -                                                   | -           | -        | -         | -            | 2.61                                               | (1.81-3.77) | 3.19E-07 | 185       | 164,415      |
| 782.3     | Edema                                                                          | -                                                   | -           | -        | -         | -            | 2.22                                               | (1.62-3.03) | 5.54E-07 | 301       | 162,355      |
| 781       | Symptoms involving nervous and musculoskeletal systems                         | -                                                   | -           | -        | -         | -            | 3.44                                               | (2.11-5.60) | 7.36E-07 | 105       | 173,467      |
| 433.1     | Occlusion and stenosis of precerebral arteries                                 | -                                                   | -           | -        | -         | -            | 4.72                                               | (2.47-9.00) | 2.6E-06  | 64        | 165,557      |
| 260       | Protein-calorie malnutrition                                                   | -                                                   | -           | -        | -         | -            | 4.23                                               | (2.29-7.82) | 4.06E-06 | 69        | 151,935      |
| 278.1     | Obesity                                                                        | -                                                   | -           | -        | -         | -            | 1.80                                               | (1.40-2.32) | 4.28E-06 | 437       | 149,748      |
| 348.8     | Encephalopathy, not elsewhere classified                                       | -                                                   | -           | -        | -         | -            | 11.6                                               | (4.06-33.0) | 4.6E-06  | 19        | 154,973      |

|        |                                                               |   |   |   |   |   |      |             |          |     |         |
|--------|---------------------------------------------------------------|---|---|---|---|---|------|-------------|----------|-----|---------|
| 649.1  | Diabetes or abnormal glucose tolerance complicating pregnancy | - | - | - | - | - | 4.91 | (2.48-9.72) | 5.01E-06 | 39  | 92,130  |
| 79     | Viral infection                                               | - | - | - | - | - | 3.97 | (2.18-7.23) | 6.42E-06 | 74  | 144,377 |
| 244.4  | Hypothyroidism NOS                                            | - | - | - | - | - | 2.10 | (1.51-2.92) | 1.04E-05 | 261 | 154,957 |
| 327.32 | Obstructive sleep apnea                                       | - | - | - | - | - | 1.77 | (1.37-2.29) | 1.39E-05 | 479 | 145,658 |
| 276.13 | Hyperpotassemia                                               | - | - | - | - | - | 3.18 | (1.87-5.41) | 1.96E-05 | 108 | 144,713 |
| 199    | Neoplasm of uncertain behavior                                | - | - | - | - | - | 3.23 | (1.87-5.60) | 2.83E-05 | 84  | 166,548 |
| 428.4  | Heart failure with preserved EF                               | - | - | - | - | - | 2.78 | (1.69-4.56) | 5.17E-05 | 142 | 159,733 |
| 285.22 | Anemia in neoplastic disease                                  | - | - | - | - | - | 2.88 | (1.73-4.82) | 5.18E-05 | 117 | 141,744 |
| 701.2  | Scar conditions and fibrosis of skin                          | - | - | - | - | - | 3.04 | (1.77-5.23) | 5.44E-05 | 102 | 166,637 |

<sup>a</sup> First post-acute diagnosis made within 60 days of recovery following COVID-19 testing

<sup>b</sup> First post-acute diagnosis made after 60 days of recovery following COVID-19 testing

**Table S9. Sensitivity analysis: adults with a least one follow-up visit in post-acute period.**

| <b>Phecode</b> | <b>Description</b>                                                             | <b>Odds Ratio</b> | <b>95% CI</b> | <b>p value</b> | <b>No. cases</b> | <b>No. controls</b> |
|----------------|--------------------------------------------------------------------------------|-------------------|---------------|----------------|------------------|---------------------|
| 512.9          | Other dyspnea                                                                  | 3.05              | (2.53-3.68)   | 3.18E-31       | 811              | 50,602              |
| 512.7          | Shortness of breath                                                            | 2.52              | (2.11-3.00)   | 6.45E-25       | 988              | 50,602              |
| 569.2          | Gastrointestinal complications                                                 | 5.86              | (3.94-8.73)   | 3.00E-18       | 116              | 97,430              |
| 278.11         | Morbid obesity                                                                 | 2.24              | (1.84-2.72)   | 6.34E-16       | 623              | 88,502              |
| 509.1          | Respiratory failure                                                            | 6.99              | (4.28-11.4)   | 6.96E-15       | 101              | 93,258              |
| 649            | Conditions of the mother complicating pregnancy, childbirth, or the puerperium | 3.65              | (2.61-5.10)   | 3.49E-14       | 167              | 60,558              |
| 359.2          | Myopathy                                                                       | 19.1              | (8.69-41.9)   | 2.03E-13       | 33               | 103,726             |
| 136            | Other infectious and parasitic diseases                                        | 8.63              | (4.84-15.4)   | 2.73E-13       | 54               | 110,018             |
| 418.1          | Precordial pain                                                                | 3.03              | (2.22-4.13)   | 2.7E-12        | 278              | 78,592              |
| 427.9          | Palpitations                                                                   | 2.03              | (1.66-2.48)   | 5.26E-12       | 627              | 76,834              |
| 418            | Nonspecific chest pain                                                         | 1.95              | (1.61-2.36)   | 8.73E-12       | 745              | 78,592              |
| 646            | Other complications of pregnancy NEC                                           | 5.35              | (3.23-8.87)   | 8.21E-11       | 69               | 63,503              |
| 427.21         | Atrial fibrillation                                                            | 2.53              | (1.91-3.36)   | 1.29E-10       | 443              | 76,834              |
| 585.1          | Acute renal failure                                                            | 2.93              | (2.11-4.08)   | 1.59E-10       | 309              | 91,680              |
| 1010.6         | Reproductive and maternal health services                                      | 1.79              | (1.47-2.19)   | 6.06E-09       | 549              | 104,034             |
| 1010           | Other tests                                                                    | 2.97              | (2.05-4.29)   | 8.00E-09       | 155              | 99,632              |
| 644            | Anemia during pregnancy                                                        | 6.69              | (3.37-13.3)   | 5.62E-08       | 38               | 65,119              |
| 350.1          | Abnormal involuntary movements                                                 | 2.40              | (1.74-3.30)   | 7.54E-08       | 256              | 101,168             |
| 671            | Venous/cerebrovascular complications embolism in pregnancy and the puerperium  | 19.2              | (6.51-56.6)   | 8.6E-08        | 17               | 66,122              |
| 638            | Other high-risk pregnancy                                                      | 2.11              | (1.61-2.78)   | 9.57E-08       | 298              | 107,781             |
| 452.2          | Deep vein thrombosis [DVT]                                                     | 3.11              | (2.02-4.79)   | 2.61E-07       | 138              | 93,807              |
| 649.1          | Diabetes or abnormal glucose tolerance complicating pregnancy                  | 4.40              | (2.50-7.75)   | 2.68E-07       | 57               | 60,558              |
| 292            | Neurological disorders                                                         | 2.33              | (1.68-3.22)   | 4.11E-07       | 242              | 96,775              |
| 1013           | Asphyxia and hypoxemia                                                         | 5.24              | (2.76-9.95)   | 4.28E-07       | 52               | 105,514             |
| 782.3          | Edema                                                                          | 1.99              | (1.52-2.60)   | 4.72E-07       | 424              | 98,285              |
| 781            | Symptoms involving nervous and musculoskeletal systems                         | 2.89              | (1.90-4.39)   | 7.16E-07       | 151              | 108,474             |
| 599.2          | Retention of urine                                                             | 2.72              | (1.82-4.08)   | 1.21E-06       | 184              | 82,558              |
| 285            | Other anemias                                                                  | 1.92              | (1.47-2.51)   | 1.87E-06       | 473              | 83,038              |
| 401.1          | Essential hypertension                                                         | 1.42              | (1.23-1.64)   | 2.71E-06       | 1697             | 66,158              |
| 587            | Kidney replaced by transpant                                                   | 26.5              | (6.61-106.)   | 3.71E-06       | 22               | 91,680              |
| 514            | Abnormal findings examination of lungs                                         | 2.18              | (1.57-3.04)   | 3.75E-06       | 350              | 96,271              |
| 420.1          | Myocarditis                                                                    | 9.03              | (3.47-23.5)   | 6.64E-06       | 20               | 105,934             |
| 250.2          | Type 2 diabetes                                                                | 1.73              | (1.36-2.20)   | 9.29E-06       | 572              | 83,868              |
| 278.1          | Obesity                                                                        | 1.64              | (1.31-2.04)   | 1.07E-05       | 565              | 88,502              |
| 327.32         | Obstructive sleep apnea                                                        | 1.62              | (1.30-2.01)   | 1.54E-05       | 669              | 84,158              |
| 348.8          | Encephalopathy, not elsewhere classified                                       | 5.96              | (2.64-13.5)   | 1.79E-05       | 32               | 94,836              |
| 502            | Postinflammatory pulmonary fibrosis                                            | 5.34              | (2.44-11.7)   | 2.79E-05       | 40               | 93,258              |
| 653            | Problems associated with amniotic cavity and membranes                         | 7.02              | (2.75-17.9)   | 4.49E-05       | 19               | 61,980              |
| 655            | Known or suspected fetal abnormality affecting management of mother            | 2.13              | (1.48-3.06)   | 4.55E-05       | 158              | 59,807              |

**Table S10. Sensitivity analysis: phenotype case definition of one post-acute phecode.**

| <b>Phecode</b> | <b>Description</b>                                                             | <b>Odds Ratio</b> | <b>95% CI</b> | <b>p value</b> | <b>No. cases</b> | <b>No. controls</b> |
|----------------|--------------------------------------------------------------------------------|-------------------|---------------|----------------|------------------|---------------------|
| 512.9          | Other dyspnea                                                                  | 2.13              | (1.89-2.41)   | 8.88E-35       | 2202             | 93,936              |
| 136            | Other infectious and parasitic diseases                                        | 6.51              | (4.74-8.92)   | 3.24E-31       | 185              | 181,966             |
| 418.1          | Precordial pain                                                                | 2.62              | (2.19-3.14)   | 6.66E-26       | 978              | 138,537             |
| 509.1          | Respiratory failure                                                            | 4.85              | (3.61-6.50)   | 8.38E-26       | 304              | 157,792             |
| 278.11         | Morbid obesity                                                                 | 1.81              | (1.59-2.05)   | 3.45E-20       | 1678             | 154,861             |
| 646            | Other complications of pregnancy NEC                                           | 3.61              | (2.73-4.78)   | 3.16E-19       | 240              | 99,542              |
| 512.7          | Shortness of breath                                                            | 1.60              | (1.44-1.77)   | 5.86E-19       | 3182             | 93,936              |
| 649            | Conditions of the mother complicating pregnancy, childbirth, or the puerperium | 2.97              | (2.32-3.79)   | 3.25E-18       | 323              | 95,518              |
| 647            | Infectious and parasitic complications affecting pregnancy                     | 12.33             | (6.84-22.2)   | 7.03E-17       | 65               | 102,065             |
| 636            | Early or threatened labor; hemorrhage in early pregnancy                       | 7.35              | (4.59-11.8)   | 8.94E-17       | 79               | 95,926              |
| 1010           | Other tests                                                                    | 1.77              | (1.55-2.03)   | 1.92E-16       | 1365             | 169,347             |
| 569.2          | Gastrointestinal complications                                                 | 3.83              | (2.77-5.29)   | 3.59E-16       | 221              | 166,825             |
| 285            | Other anemias                                                                  | 1.88              | (1.61-2.20)   | 7.55E-16       | 1515             | 146,505             |
| 585.1          | Acute renal failure                                                            | 2.47              | (1.98-3.08)   | 1.16E-15       | 792              | 157,475             |
| 427.21         | Atrial fibrillation                                                            | 2.37              | (1.90-2.96)   | 1.52E-14       | 793              | 137,086             |
| 348.8          | Encephalopathy, not elsewhere classified                                       | 5.32              | (3.40-8.34)   | 2.85E-13       | 113              | 160,519             |
| 359.2          | Myopathy                                                                       | 5.81              | (3.62-9.32)   | 3.38E-13       | 91               | 174,863             |
| 782.3          | Edema                                                                          | 1.76              | (1.51-2.04)   | 3.47E-13       | 1396             | 168,184             |
| 644            | Anemia during pregnancy                                                        | 4.62              | (3.00-7.10)   | 3.19E-12       | 111              | 101,761             |
| 327.32         | Obstructive sleep apnea                                                        | 1.63              | (1.42-1.87)   | 3.47E-12       | 1737             | 150,608             |
| 798.1          | Chronic fatigue syndrome                                                       | 1.81              | (1.53-2.15)   | 4.63E-12       | 946              | 131,770             |
| 418            | Nonspecific chest pain                                                         | 1.49              | (1.33-1.67)   | 4.65E-12       | 2233             | 138,537             |
| 427.5          | Arrhythmia (cardiac) NOS                                                       | 2.13              | (1.72-2.64)   | 5.6E-12        | 870              | 137,086             |
| 427.9          | Palpitations                                                                   | 1.65              | (1.43-1.92)   | 1.45E-11       | 1306             | 137,086             |
| 278.1          | Obesity                                                                        | 1.56              | (1.37-1.77)   | 1.49E-11       | 1802             | 154,861             |
| 452.2          | Deep vein thrombosis [DVT]                                                     | 2.7               | (2.01-3.62)   | 4.58E-11       | 327              | 162,711             |
| 292            | Neurological disorders                                                         | 1.97              | (1.61-2.41)   | 4.75E-11       | 668              | 162,234             |
| 671            | Venous/cerebrovascular complications embolism in pregnancy and the puerperium  | 8.74              | (4.54-16.8)   | 9.23E-11       | 45               | 103,586             |
| 772.3          | Muscle weakness                                                                | 1.79              | (1.49-2.14)   | 2.86E-10       | 1139             | 155,495             |
| 661            | Fetal distress and abnormal forces of labor                                    | 9.70              | (4.70-20.0)   | 7.75E-10       | 34               | 181,989             |
| 401.1          | Essential hypertension                                                         | 1.36              | (1.23-1.49)   | 8.65E-10       | 4049             | 122,907             |
| 286.7          | Other and unspecified coagulation defects                                      | 2.76              | (1.98-3.86)   | 2.63E-09       | 283              | 168,886             |
| 514            | Abnormal findings examination of lungs                                         | 1.65              | (1.40-1.94)   | 2.84E-09       | 1442             | 163,569             |
| 1013           | Asphyxia and hypoxemia                                                         | 2.90              | (2.04-4.12)   | 3.2E-09        | 215              | 175,439             |
| 655            | Known or suspected fetal abnormality affecting management of mother            | 1.94              | (1.55-2.43)   | 8.5E-09        | 433              | 94,447              |
| 509.2          | Respiratory insufficiency                                                      | 8.21              | (3.97-17.0)   | 1.27E-08       | 40               | 157,792             |
| 260            | Protein-calorie malnutrition                                                   | 2.26              | (1.70-3.02)   | 2.48E-08       | 438              | 157,175             |
| 642            | Hypertension complicating pregnancy, childbirth, and the puerperium            | 3.68              | (2.31-5.86)   | 4.35E-08       | 90               | 102,574             |
| 420.1          | Myocarditis                                                                    | 7.72              | (3.69-16.1)   | 5.43E-08       | 36               | 177,003             |
| 288.2          | Elevated white blood cell count                                                | 1.96              | (1.54-2.50)   | 6.43E-08       | 503              | 158,244             |
| 638            | Other high-risk pregnancy                                                      | 1.85              | (1.48-2.31)   | 8.07E-08       | 481              | 178,757             |
| 599.3          | Dysuria                                                                        | 1.35              | (1.21-1.50)   | 8.61E-08       | 2383             | 149,134             |

|        |                                                               |      |             |          |      |         |
|--------|---------------------------------------------------------------|------|-------------|----------|------|---------|
| 727.1  | Synovitis and tenosynovitis                                   | 1.79 | (1.44-2.21) | 8.76E-08 | 688  | 148,134 |
| 276.6  | Fluid overload                                                | 3.30 | (2.13-5.12) | 9.52E-08 | 191  | 149,733 |
| 595    | Hydronephrosis                                                | 2.45 | (1.75-3.44) | 1.97E-07 | 290  | 176,011 |
| 250.2  | Type 2 diabetes                                               | 1.55 | (1.31-1.83) | 2.25E-07 | 1418 | 148,033 |
| 427.7  | Tachycardia NOS                                               | 1.62 | (1.35-1.95) | 2.71E-07 | 857  | 137,086 |
| 38.3   | Bacteremia                                                    | 4.25 | (2.44-7.41) | 3.32E-07 | 73   | 166,009 |
| 704.1  | Alopecia                                                      | 1.74 | (1.41-2.15) | 3.33E-07 | 563  | 174,033 |
| 649.1  | Diabetes or abnormal glucose tolerance complicating pregnancy | 3.23 | (2.04-5.12) | 5.51E-07 | 96   | 95,518  |
| 260.2  | severe protein-calorie malnutrition                           | 3.03 | (1.95-4.68) | 6.77E-07 | 165  | 157,175 |
| 790.6  | Other abnormal blood chemistry                                | 1.36 | (1.21-1.54) | 7.51E-07 | 2209 | 168,380 |
| 535.2  | Atrophic gastritis                                            | 1.76 | (1.40-2.20) | 8.30E-07 | 684  | 170,481 |
| 38     | Septicemia                                                    | 4.68 | (2.53-8.68) | 9.48E-07 | 63   | 166,009 |
| 642.1  | Preeclampsia and eclampsia                                    | 5.74 | (2.84-11.6) | 1.1E-06  | 46   | 102,574 |
| 1009   | Injury, NOS                                                   | 1.32 | (1.18-1.47) | 1.16E-06 | 2374 | 148,125 |
| 411.2  | Myocardial infarction                                         | 1.99 | (1.51-2.63) | 1.24E-06 | 542  | 159,985 |
| 550.2  | Diaphragmatic hernia                                          | 1.69 | (1.37-2.10) | 1.27E-06 | 787  | 170,725 |
| 306    | Other mental disorder                                         | 2.43 | (1.70-3.49) | 1.36E-06 | 193  | 124,310 |
| 745    | Pain in joint                                                 | 1.24 | (1.14-1.35) | 1.46E-06 | 4298 | 133,022 |
| 455    | Hemorrhoids                                                   | 1.41 | (1.23-1.62) | 1.55E-06 | 1724 | 162,711 |
| 593    | Hematuria                                                     | 1.57 | (1.31-1.89) | 1.7E-06  | 861  | 152,649 |
| 617    | Disorders secondary to childbirth, surgery, trauma            | 1.50 | (1.27-1.77) | 1.99E-06 | 934  | 181,721 |
| 994.2  | Sepsis                                                        | 4.06 | (2.28-7.25) | 2.03E-06 | 73   | 178,584 |
| 411.4  | Coronary atherosclerosis                                      | 1.53 | (1.29-1.83) | 2.1E-06  | 1374 | 159,985 |
| 647.1  | Infections of genitourinary tract during pregnancy            | 4.11 | (2.29-7.36) | 2.11E-06 | 58   | 102,065 |
| 599.2  | Retention of urine                                            | 1.85 | (1.43-2.38) | 2.23E-06 | 527  | 149,134 |
| 272.1  | Hyperlipidemia                                                | 1.38 | (1.21-1.58) | 2.96E-06 | 2322 | 140,288 |
| 567    | Peritonitis and retroperitoneal infections                    | 3.53 | (2.08-5.99) | 2.98E-06 | 95   | 166,825 |
| 619.4  | Noninflammatory disorders of vagina                           | 1.50 | (1.26-1.78) | 3.04E-06 | 917  | 93,150  |
| 781    | Symptoms involving nervous and musculoskeletal systems        | 1.92 | (1.46-2.53) | 3.76E-06 | 430  | 180,070 |
| 480.2  | Viral pneumonia                                               | 6.74 | (3.00-15.2) | 3.78E-06 | 31   | 153,134 |
| 350.1  | Abnormal involuntary movements                                | 1.6  | (1.31-1.95) | 3.83E-06 | 807  | 170,487 |
| 502    | Postinflammatory pulmonary fibrosis                           | 2.48 | (1.68-3.65) | 4.54E-06 | 201  | 157,792 |
| 244.4  | Hypothyroidism NOS                                            | 1.49 | (1.26-1.77) | 4.58E-06 | 1163 | 160,570 |
| 292.4  | Altered mental status                                         | 2.13 | (1.54-2.94) | 4.60E-06 | 315  | 162,234 |
| 656    | Other perinatal conditions of fetus or newborn                | 2.4  | (1.65-3.51) | 5.26E-06 | 149  | 182,164 |
| 509.8  | Dependence on respirator [Ventilator] or supplemental oxygen  | 3.24 | (1.94-5.41) | 7.34E-06 | 123  | 157,792 |
| 41.9   | Infection with drug-resistant microorganisms                  | 6.52 | (2.87-14.8) | 7.48E-06 | 30   | 166,009 |
| 401.22 | Hypertensive chronic kidney disease                           | 1.98 | (1.45-2.69) | 1.34E-05 | 582  | 122,907 |
| 773    | Pain in limb                                                  | 1.23 | (1.12-1.36) | 1.45E-05 | 3532 | 147,087 |
| 261.4  | Vitamin D deficiency                                          | 1.35 | (1.18-1.54) | 1.77E-05 | 1782 | 157,175 |
| 395.2  | Nonrheumatic aortic valve disorders                           | 1.88 | (1.41-2.50) | 1.8E-05  | 412  | 166,630 |
| 1010.6 | Reproductive and maternal health services                     | 1.43 | (1.21-1.68) | 2.04E-05 | 865  | 172,787 |
| 304    | Adjustment reaction                                           | 1.47 | (1.23-1.76) | 2.27E-05 | 899  | 124,310 |
| 357    | Inflammatory and toxic neuropathy                             | 1.51 | (1.25-1.83) | 2.32E-05 | 997  | 174,863 |
| 532    | Dysphagia                                                     | 1.46 | (1.23-1.75) | 2.38E-05 | 1155 | 137,590 |
| 427.22 | Atrial flutter                                                | 2.23 | (1.54-3.23) | 2.40E-05 | 320  | 137,086 |
| 300.1  | Anxiety disorder                                              | 1.22 | (1.11-1.34) | 2.41E-05 | 3961 | 124,310 |
| 250.42 | Other abnormal glucose                                        | 1.40 | (1.20-1.64) | 2.83E-05 | 1548 | 148,033 |

|        |                                                        |      |             |          |      |         |
|--------|--------------------------------------------------------|------|-------------|----------|------|---------|
| 386.9  | Dizziness and giddiness (Light-headedness and vertigo) | 1.30 | (1.15-1.48) | 2.84E-05 | 2066 | 161,499 |
| 250.22 | Type 2 diabetes with renal manifestations              | 2.34 | (1.57-3.48) | 3.08E-05 | 496  | 148,033 |
| 587    | Kidney replaced by transpant                           | 5.42 | (2.44-12.1) | 3.38E-05 | 56   | 157,475 |
| 504    | Other alveolar and parietoalveolar pneumonopathy       | 2.72 | (1.69-4.38) | 3.56E-05 | 120  | 157,792 |

**Table S11. Sensitivity analysis: adults with ≥6 months of EHR records prior to testing.**

| <b>Phecode</b> | <b>Description</b>                                                             | <b>Odds Ratio</b> | <b>95% CI</b> | <b>p value</b> | <b>No. cases</b> | <b>No. controls</b> |
|----------------|--------------------------------------------------------------------------------|-------------------|---------------|----------------|------------------|---------------------|
| 512.9          | Other dyspnea                                                                  | 2.80              | (2.27-3.46)   | 1.16E-21       | 680              | 53,761              |
| 512.7          | Shortness of breath                                                            | 2.45              | (2.02-2.98)   | 1.28E-19       | 825              | 53,761              |
| 569.2          | Gastrointestinal complications                                                 | 7.06              | (4.47-11.2)   | 5.48E-17       | 87               | 110,991             |
| 278.11         | Morbid obesity                                                                 | 2.37              | (1.91-2.93)   | 4.59E-15       | 506              | 101,668             |
| 136            | Other infectious and parasitic diseases                                        | 10.0              | (5.48-18.4)   | 8.24E-14       | 50               | 123,943             |
| 418.1          | Precordial pain                                                                | 3.23              | (2.34-4.47)   | 1.39E-12       | 254              | 86,891              |
| 649            | Conditions of the mother complicating pregnancy, childbirth, or the puerperium | 3.56              | (2.42-5.22)   | 9.13E-11       | 130              | 67,497              |
| 509.1          | Respiratory failure                                                            | 5.84              | (3.36-10.1)   | 3.71E-10       | 82               | 105,765             |
| 418            | Nonspecific chest pain                                                         | 1.98              | (1.60-2.45)   | 4.79E-10       | 607              | 86,891              |
| 585.1          | Acute renal failure                                                            | 3.16              | (2.20-4.55)   | 5.70E-10       | 258              | 104,419             |
| 427.9          | Palpitations                                                                   | 1.98              | (1.59-2.47)   | 1.65E-09       | 533              | 87,904              |
| 646            | Other complications of pregnancy NEC                                           | 5.17              | (2.90-9.22)   | 2.50E-08       | 52               | 70,931              |
| 292            | Neurological disorders                                                         | 2.60              | (1.83-3.68)   | 7.80E-08       | 209              | 108,436             |
| 782.3          | Edema                                                                          | 2.17              | (1.63-2.89)   | 1.01E-07       | 355              | 111,634             |
| 350.1          | Abnormal involuntary movements                                                 | 2.54              | (1.80-3.60)   | 1.36E-07       | 213              | 114,492             |
| 781            | Symptoms involving nervous and musculoskeletal systems                         | 3.31              | (2.10-5.22)   | 2.43E-07       | 123              | 122,421             |
| 1010           | Other tests                                                                    | 2.88              | (1.91-4.34)   | 4.48E-07       | 130              | 112,904             |
| 427.21         | Atrial fibrillation                                                            | 2.30              | (1.66-3.19)   | 5.25E-07       | 335              | 87,904              |
| 644            | Anemia during pregnancy                                                        | 7.11              | (3.22-15.7)   | 1.22E-06       | 28               | 73,007              |
| 359.2          | Myopathy                                                                       | 11.0              | (4.16-29.0)   | 1.34E-06       | 21               | 117,651             |
| 599.2          | Retention of urine                                                             | 2.97              | (1.88-4.69)   | 2.90E-06       | 147              | 94,396              |
| 638            | Other high-risk pregnancy                                                      | 1.99              | (1.48-2.69)   | 6.16E-06       | 254              | 121,636             |
| 502            | Postinflammatory pulmonary fibrosis                                            | 6.45              | (2.79-14.9)   | 1.31E-05       | 33               | 105,765             |
| 649.1          | Diabetes or abnormal glucose tolerance complicating pregnancy                  | 4.10              | (2.14-7.86)   | 2.06E-05       | 43               | 67,497              |
| 420.1          | Myocarditis                                                                    | 9.91              | (3.42-28.7)   | 2.37E-05       | 16               | 120,148             |
| 386.9          | Dizziness and giddiness                                                        | 1.66              | (1.31-2.10)   | 2.85E-05       | 525              | 105,771             |
| 199            | Neoplasm of uncertain behavior                                                 | 2.91              | (1.76-4.80)   | 3.03E-05       | 107              | 116,518             |
| 1010.6         | Reproductive and maternal health services                                      | 1.62              | (1.29-2.05)   | 4.50E-05       | 416              | 117,591             |
| 1013           | Asphyxia and hypoxemia                                                         | 4.90              | (2.26-10.6)   | 5.42E-05       | 37               | 119,659             |



**Table S12. Sensitivity analysis: propensity-matched cohort.**

| <b>Phecode</b> | <b>Description</b>                                                             | <b>Odds Ratio</b> | <b>95% CI</b> | <b>p value</b> | <b>No. cases</b> | <b>No. controls</b> |
|----------------|--------------------------------------------------------------------------------|-------------------|---------------|----------------|------------------|---------------------|
| 512.9          | Other dyspnea                                                                  | 2.88              | (2.37-3.50)   | 3.22E-26       | 487              | 53,243              |
| 512.7          | Shortness of breath                                                            | 2.35              | (1.96-2.82)   | 1.54E-20       | 602              | 53,243              |
| 278.11         | Morbid obesity                                                                 | 2.16              | (1.75-2.65)   | 2.69E-13       | 402              | 103,905             |
| 427.9          | Palpitations                                                                   | 2.15              | (1.74-2.66)   | 1.27E-12       | 386              | 94,868              |
| 509.1          | Respiratory failure                                                            | 6.44              | (3.73-11.1)   | 2.48E-11       | 59               | 106,519             |
| 569.2          | Gastrointestinal complications                                                 | 4.54              | (2.88-7.16)   | 8.01E-11       | 78               | 110,663             |
| 136            | Other infectious and parasitic diseases                                        | 10.5              | (5.04-21.7)   | 2.74E-10       | 39               | 117,892             |
| 418            | Nonspecific chest pain                                                         | 1.89              | (1.55-2.31)   | 4.29E-10       | 446              | 92,556              |
| 418.1          | Precordial pain                                                                | 2.77              | (1.98-3.88)   | 3.34E-09       | 149              | 92,556              |
| 649            | Conditions of the mother complicating pregnancy, childbirth, or the puerperium | 2.95              | (2.06-4.21)   | 3.36E-09       | 126              | 62,991              |
| 585.1          | Acute renal failure                                                            | 2.96              | (2.05-4.26)   | 6.35E-09       | 149              | 106,463             |
| 427.21         | Atrial fibrillation                                                            | 2.35              | (1.73-3.19)   | 4.17E-08       | 209              | 94,868              |
| 359.2          | Myopathy                                                                       | 15.7              | (5.83-42.0)   | 4.77E-08       | 26               | 114,733             |
| 782.3          | Edema                                                                          | 2.24              | (1.67-3.01)   | 7.19E-08       | 200              | 110,984             |
| 646            | Other complications of pregnancy NEC                                           | 4.67              | (2.66-8.22)   | 8.36E-08       | 52               | 65,260              |
| 1010           | Other tests                                                                    | 2.89              | (1.93-4.31)   | 2.24E-07       | 100              | 110,868             |
| 1013           | Asphyxia and hypoxemia                                                         | 10.9              | (4.40-26.9)   | 2.4E-07        | 23               | 115,135             |
| 292            | Neurological disorders                                                         | 2.42              | (1.71-3.44)   | 7.63E-07       | 139              | 108,388             |
| 1010.6         | Reproductive and maternal health services                                      | 1.59              | (1.31-1.93)   | 3.29E-06       | 478              | 113,604             |
| 452.2          | Deep vein thrombosis [DVT]                                                     | 3.05              | (1.90-4.90)   | 3.82E-06       | 73               | 107,835             |
| 350.1          | Abnormal involuntary movements                                                 | 2.23              | (1.59-3.13)   | 3.99E-06       | 149              | 110,095             |
| 638            | Other high-risk pregnancy                                                      | 1.94              | (1.46-2.58)   | 4.38E-06       | 215              | 116,623             |
| 278.1          | Obesity                                                                        | 1.7               | (1.35-2.14)   | 6.37E-06       | 348              | 103,905             |
| 599.2          | Retention of urine                                                             | 2.82              | (1.78-4.47)   | 9.77E-06       | 82               | 98,114              |
| 514            | Abnormal findings examination of lungs                                         | 2.19              | (1.54-3.12)   | 1.43E-05       | 155              | 108,938             |
| 502            | Postinflammatory pulmonary fibrosis                                            | 9.23              | (3.34-25.5)   | 1.8E-05        | 17               | 106,519             |
| 285            | Other anemias                                                                  | 1.85              | (1.39-2.46)   | 2.19E-05       | 233              | 101,673             |
| 649.1          | Diabetes or abnormal glucose tolerance complicating pregnancy                  | 3.61              | (1.98-6.56)   | 2.64E-05       | 44               | 62,991              |
| 327.32         | Obstructive sleep apnea                                                        | 1.63              | (1.30-2.06)   | 2.64E-05       | 368              | 101,184             |
| 781            | Symptoms involving nervous and musculoskeletal systems                         | 2.58              | (1.63-4.10)   | 5.69E-05       | 77               | 117,346             |

**Table S13. Covariate balance in propensity-matched cohort.**

| Characteristic                                              | Never Infected  | SARS-CoV-2 Positive | Overall         | Standardized mean difference <sup>a</sup> |
|-------------------------------------------------------------|-----------------|---------------------|-----------------|-------------------------------------------|
| Number in cohort                                            | 90,264          | 30,088              | 120,352         |                                           |
| Age (median [IQR])                                          | 43 [31, 59]     | 43 [30, 57]         | 43 [30, 59]     | 0.004                                     |
| Sex (%)                                                     |                 |                     |                 | 0.013                                     |
| Female                                                      | 51,747 (57.3)   | 16,718 (55.6)       | 68,465 (56.9)   |                                           |
| Male                                                        | 38,517 (42.7)   | 13,370 (44.4)       | 51,887 (43.1)   |                                           |
| Race (%)                                                    |                 |                     |                 |                                           |
| White                                                       | 60,534 (67.1)   | 19,176 (63.7)       | 79,710 (66.2)   | 0.012                                     |
| Black                                                       | 9,654 (10.7)    | 3,274 (10.9)        | 12,928 (10.7)   | 0.027                                     |
| Other                                                       | 4,776 (5.3)     | 1,714 (5.7)         | 6,490 (5.4)     | 0.010                                     |
| Unknown                                                     | 15,300 (17.0)   | 5,924 (19.7)        | 21,224 (17.6)   | 0.013                                     |
| Ethnicity (%)                                               |                 |                     |                 |                                           |
| Non-Hispanic                                                | 68,827 (76.3)   | 21,936 (72.9)       | 90763 (75.4)    | 0.010                                     |
| Hispanic/Latino                                             | 3,027 (3.4)     | 1,217 (4.0)         | 4244 (3.5)      | 0.006                                     |
| Unknown                                                     | 18,410 (20.4)   | 69,35 (23.0)        | 25345 (21.1)    | 0.013                                     |
| Received care at VUMC prior to SARS-CoV-2 test (%)          | 63,028 (69.8)   | 20,860 (69.3)       | 83,888 (69.7)   |                                           |
| SARS-CoV-2 testing indication (%)                           |                 |                     |                 | 0.095                                     |
| Asymptomatic screening                                      | 28,982 (32.1)   | 6,095 (20.3)        | 35077 (29.1)    |                                           |
| Symptomatic testing                                         | 61,282 (67.9)   | 23,993 (79.7)       | 85275 (70.9)    |                                           |
| EHR observation time                                        |                 |                     |                 |                                           |
| Before SARS-CoV-2 test, median [IQR], years                 | 5.6 [0.8, 14.4] | 5.8 [0.8, 14.4]     | 5.7 [0.8, 14.4] | 0.001                                     |
| After recovery, median [IQR], days                          | 393 [242, 509]  | 361 [285, 427]      | 381 [252, 500]  | 0.046                                     |
| Hospitalization associated with SARS-CoV-2 test (%)         | 12,434 (13.8)   | 3,393 (11.3)        | 15,827 (13.2)   |                                           |
| Time from SARS-CoV-2 test to first follow up (median [IQR]) | 78 [46, 165]    | 86 [48, 181]        | 80 [46, 169]    | 0.034                                     |
| Died (%)                                                    | 531 (0.6)       | 158 (0.5)           | 689 (0.6)       | 0.001                                     |
| Comorbidities prior to SARS-CoV-2 test (%)                  |                 |                     |                 |                                           |
| Myocardial infarction                                       | 1,194 (1.3)     | 419 (1.4)           | 1,613 (1.3)     | 0.006                                     |
| Congestive heart failure                                    | 1,811 (2.0)     | 630 (2.1)           | 2,441 (2.0)     | 0.006                                     |
| Peripheral vascular disease                                 | 1,052 (1.2)     | 325 (1.1)           | 1,377 (1.1)     | 0.008                                     |
| Cerebrovascular disease                                     | 1,957 (2.2)     | 610 (2.0)           | 2,567 (2.1)     | 0.01                                      |
| Dementia                                                    | 327 (0.4)       | 137 (0.5)           | 464 (0.4)       | 0.015                                     |
| Chronic pulmonary disease                                   | 5,235 (5.8)     | 1,646 (5.5)         | 6,881 (5.7)     | 0.014                                     |
| Rheumatologic disease                                       | 1,555 (1.7)     | 428 (1.4)           | 1,983 (1.6)     | 0.024                                     |
| Peptic ulcer disease                                        | 405 (0.4)       | 147 (0.5)           | 552 (0.5)       | 0.006                                     |
| Diabetes                                                    | 4,993 (5.5)     | 1,964 (6.5)         | 6,957 (5.8)     | 0.042                                     |
| Mild liver disease                                          | 2,195 (2.4)     | 726 (2.4)           | 2,921 (2.4)     | 0.001                                     |
| Severe liver disease                                        | 528 (0.6)       | 170 (0.6)           | 698 (0.6)       | 0.003                                     |
| Hemiplegia or paraplegia                                    | 458 (0.5)       | 153 (0.5)           | 611 (0.5)       | 0.001                                     |
| Renal disease                                               | 1,627 (1.8)     | 750 (2.5)           | 2,377 (2.0)     | 0.048                                     |
| Any malignancy                                              | 5,268 (5.8)     | 1,463 (4.9)         | 6,731 (5.6)     | 0.043                                     |
| Metastatic solid tumor                                      | 824 (0.9)       | 246 (0.8)           | 1,070 (0.9)     | 0.01                                      |
| AIDS or HIV infection                                       | 606 (0.7)       | 173 (0.6)           | 779 (0.6)       | 0.012                                     |

Variables used to develop the propensity-scoring model for probability of testing positive for SARS-CoV-2 included age, sex, race, ethnicity, symptomatic testing indication, inpatient hospitalization around time of SARS-CoV-2 test, observation time after recovery, and length of EHR prior to SARS-CoV-2 testing.

<sup>a</sup> Standardized mean difference values of less than 0.1 indicate acceptable matching between groups.

## Supplementary Figures

Figure S1. Study CONSORT diagram

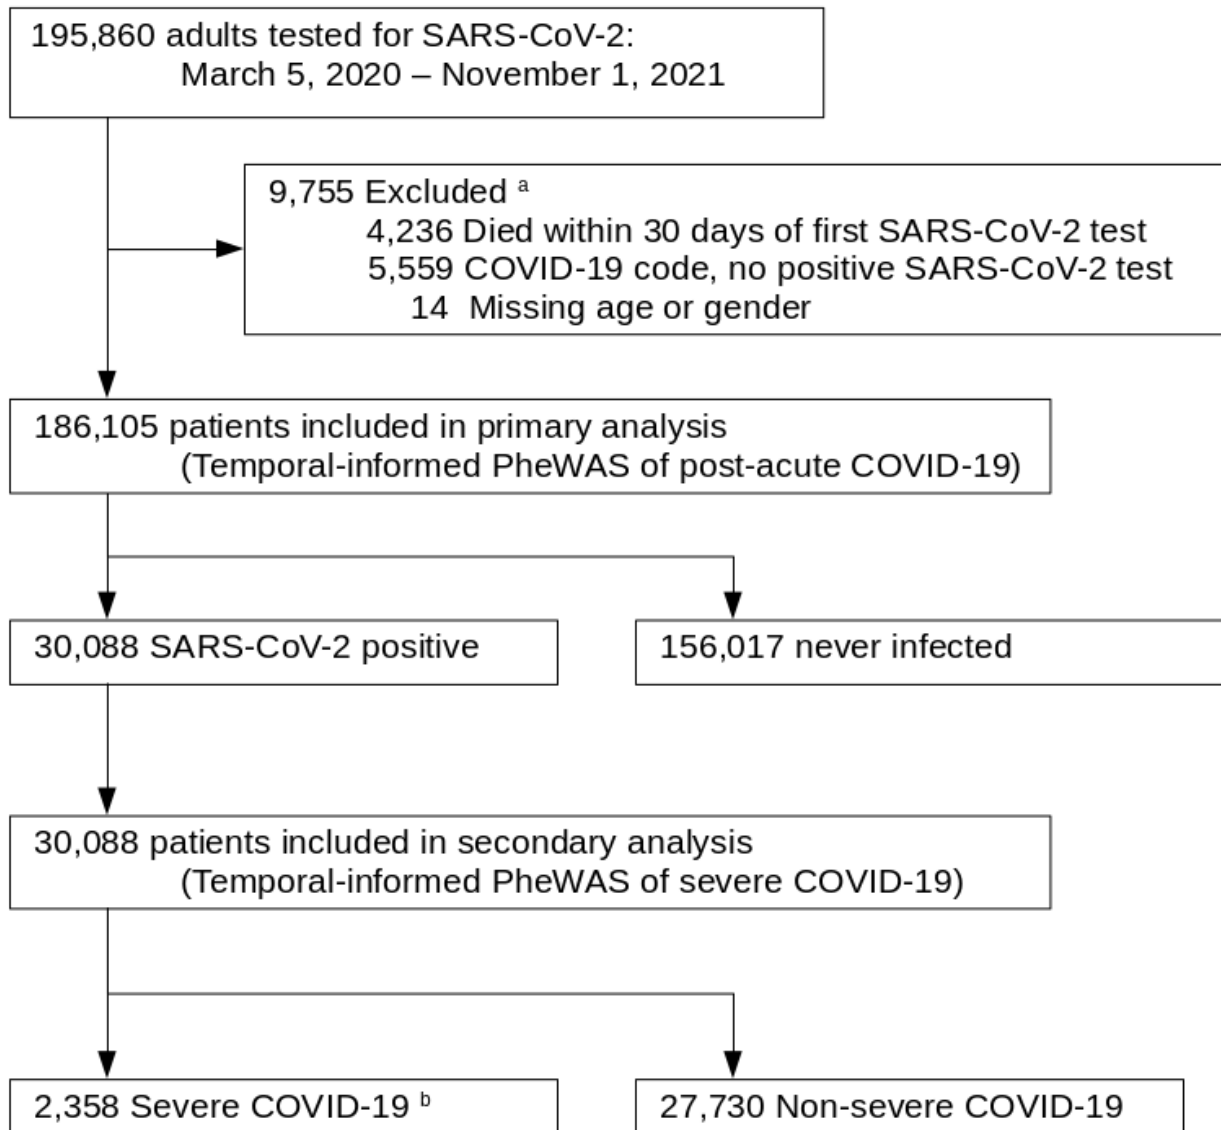

Flow diagram of adult patients in Vanderbilt COVID-19 EHR registry database, patients excluded, and numbers included in analyses. SARS-CoV-2: severe acute respiratory syndrome coronavirus 2.

COVID-19: Coronavirus disease 2019.

<sup>a</sup> Some patients had more than one reason for exclusion.

<sup>b</sup> Severe COVID-19: admitted to hospital and required supplemental oxygen.

**Figure S2. Control retention by temporal-informed phenotyping**

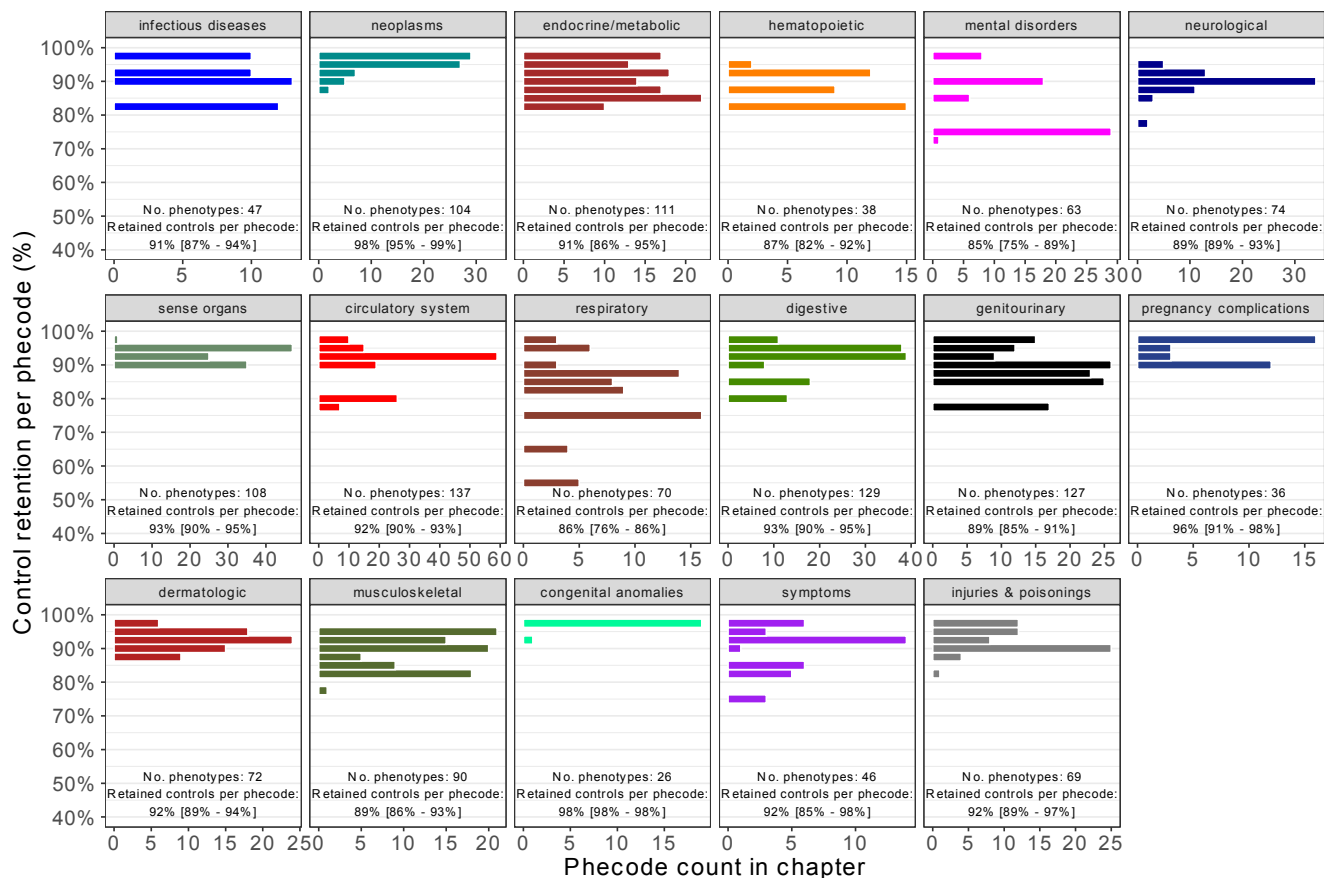

Histograms of phenotype control retention per PheWAS code (phecode) using temporal-informed phenotyping. Individual histograms indicate each chapter within the phecode hierarchy.[32] Number of phecodes per chapter are shown on *x* axis, control retention per phecode is shown on *y* axis,. Labels indicate number of phenotypes with  $\geq 10$  cases and median [interquartile range] of the per-phecode case retention in each chapter.

**Figure S3. Phenome scan of phenotypes occurring around date of SARS-CoV-2 testing**

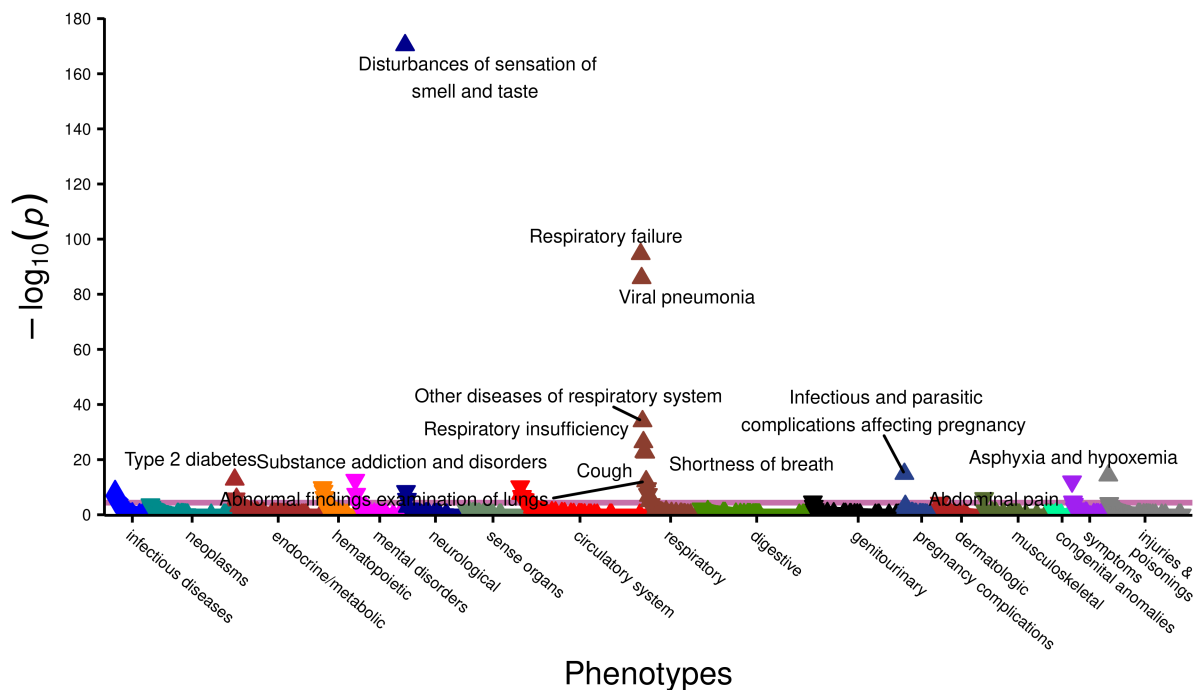

PheWAS plot of medical phenotypes associated with a positive SARS-CoV-2 test for phenotypes entered into the EHR within  $\pm 15$  days of the index test date ( $n = 186,105$ , phenotypes available for testing = 1,182). The  $x$  axis represents phecodes grouped by chapter within the phecode hierarchy.[10] The  $y$  axis represents the negative log-transformed  $p$  values obtained using logistic regression after adjusting for age, sex, race, ethnicity, length of EHR observation after recovery, indication for testing, and medical comorbidities prior to testing. Upward triangles represent phenotypes with odds ratio  $> 1.0$  for COVID-19 survivors and downward triangles represent phenotypes with odds ratio  $< 1.0$ .

**Figure S4. Phenome scan using naive post-acute phenotyping.**

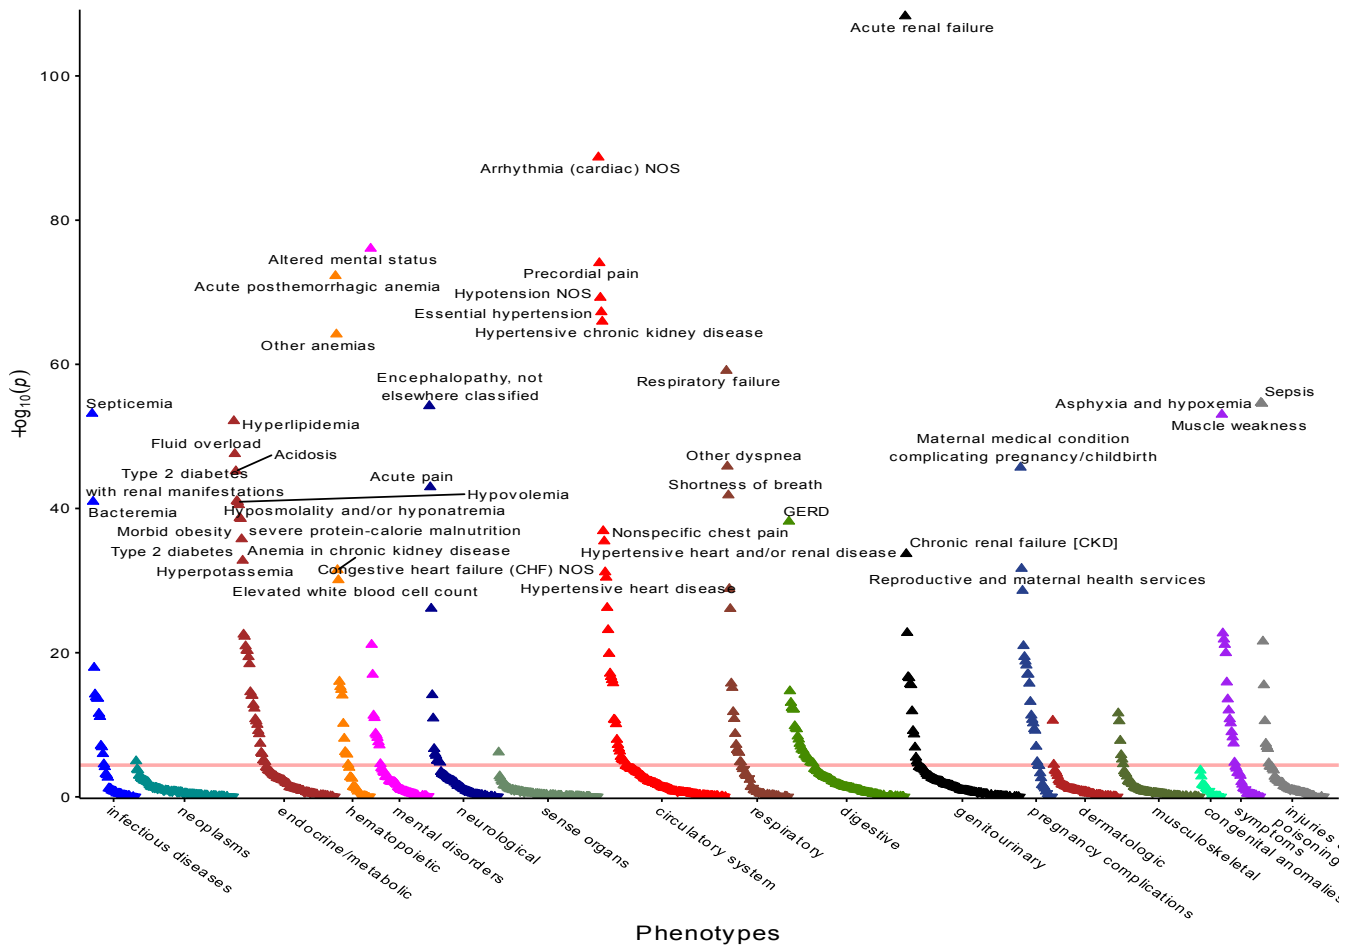

PheWAS plot of new post-acute phenotypes identified by naive phenotyping (all post-acute codes) for COVID-19 survivors versus never-infected patients as the referent group ( $n = 186,105$ , phenotypes available for testing = 1,347). The  $x$  axis represents phecodes grouped by chapter within the phecode hierarchy. The  $y$  axis represents the negative log-transformed  $p$  values obtained using logistic regression after adjusting for age, sex, race, ethnicity, length of EHR observation after recovery, indication for testing, and medical comorbidities prior to testing. Upward triangles represent phenotypes with odds ratio  $>1.0$  for COVID-19 survivors and downward triangles represent phenotypes with odds ratio  $<1.0$ . Horizontal red line indicates the phenome-wide significance  $p$  value significance using a Bonferroni correction.

**Figure S5. Comparison of PheWAS results by temporal-informed or naive phenotyping.**

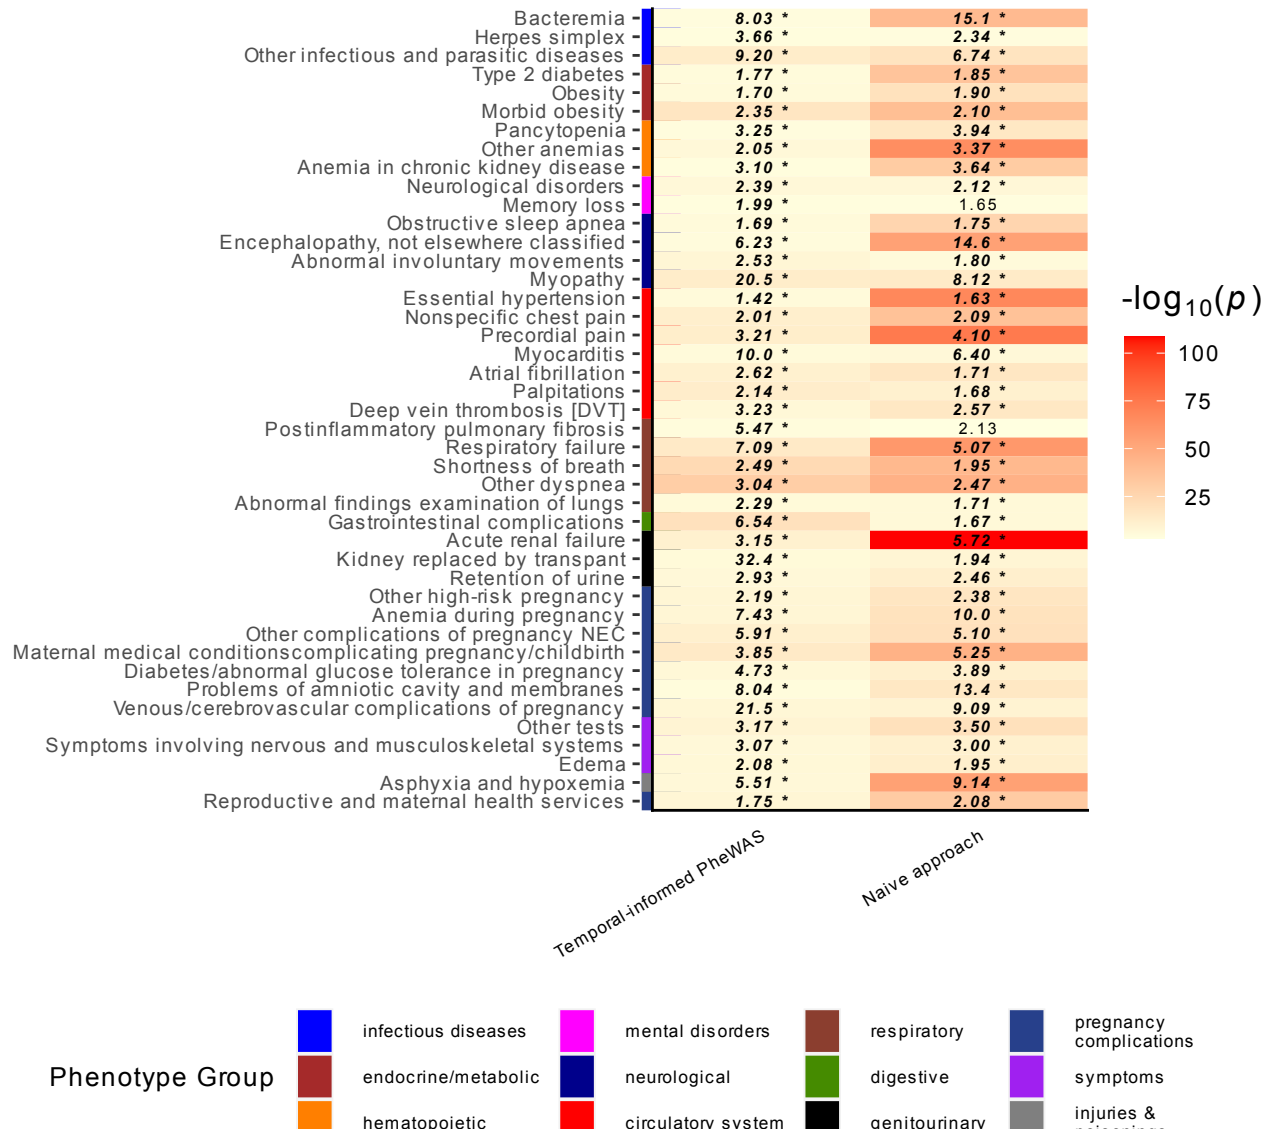

Comparison of PheWAS results using temporal-informed phenotyping (left column) and naive post-acute phenotyping (right column). The y axis represents phenotypes (as PheWAS codes / “phecodes”) that are group by category within the phecode hierarchy.[10] Cell color intensity illustrates adjusted  $p$  values by logistic regression. Text in cells show point estimates for effect odds ratios. Text in bold/italic and with a “\*” indicate PheWAS associations that were statistically significant using a Bonferroni correction. Results for phecodes that were significant in the primary analysis (left column) are displayed for brevity. Results in bold/italic text and with a “\*” indicate PheWAS associations that were statistically significant using a Bonferroni-corrected  $p$  value.

**Figure S6. Temporal-informed PheWAS: sensitivity analyses.**

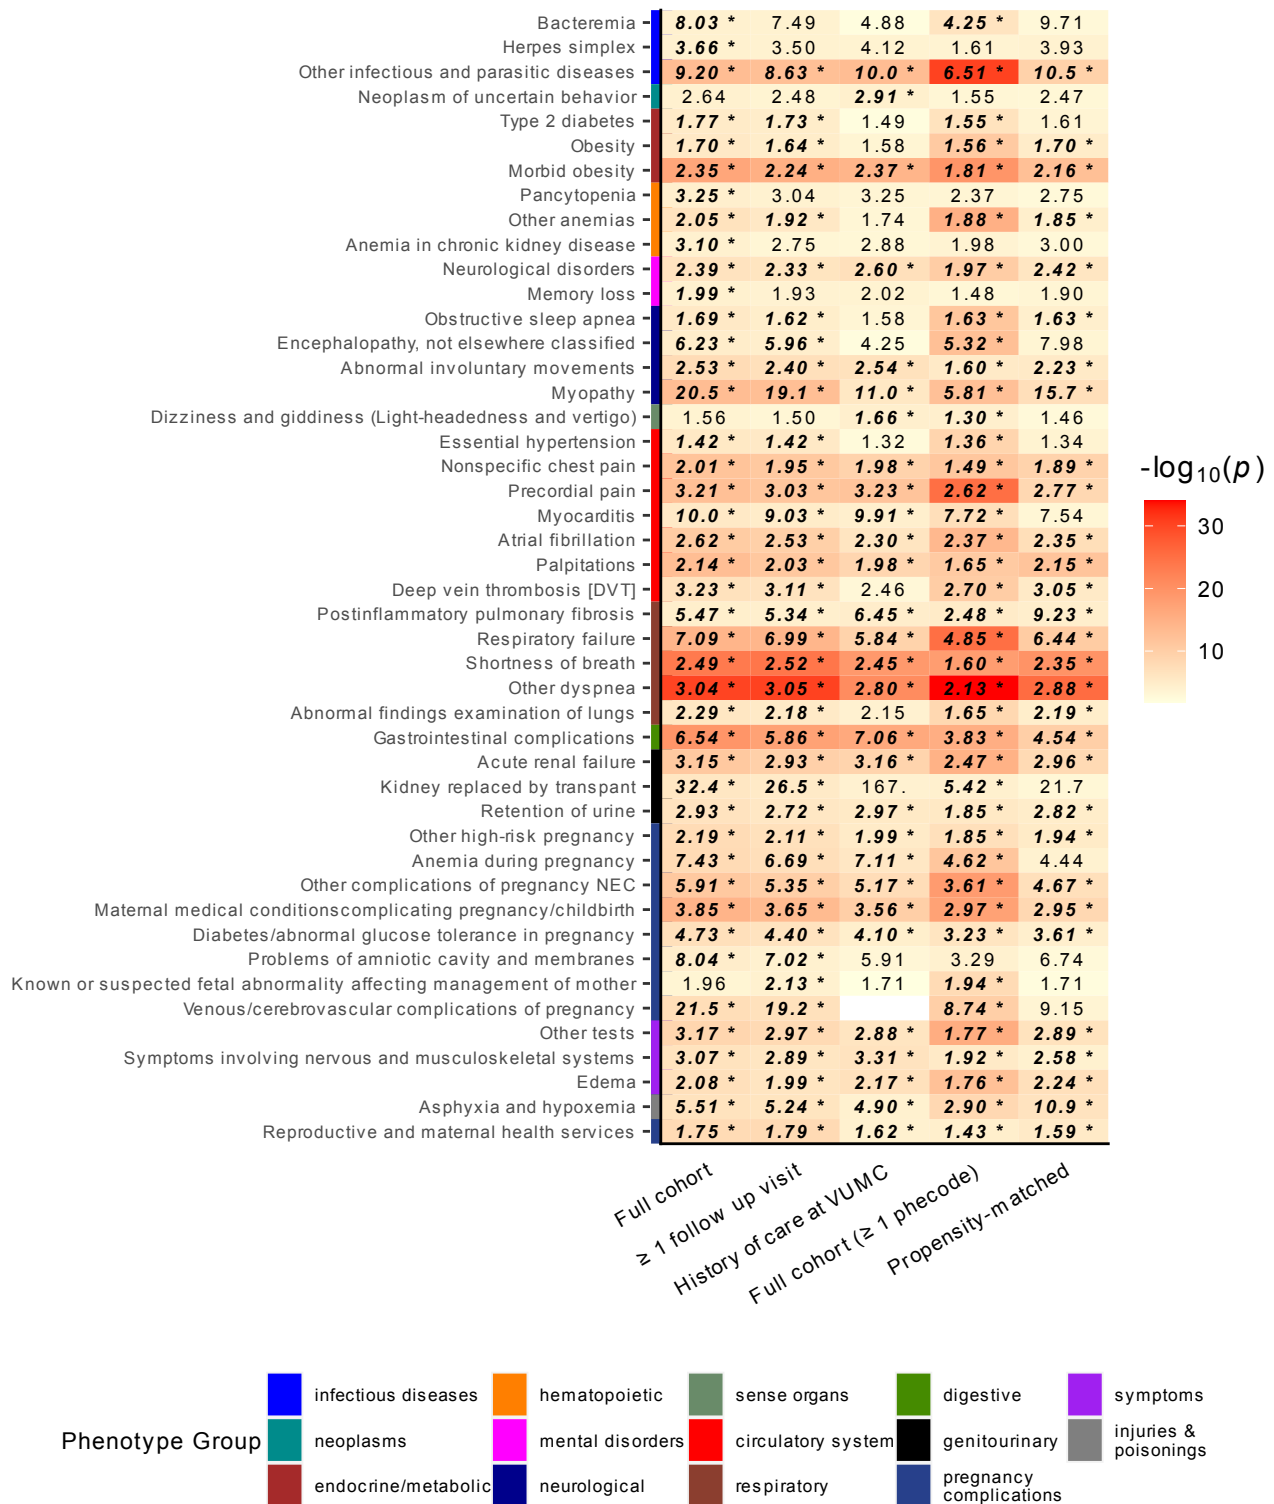



PheWAS results for new post-acute phenotypes identified during outpatient follow-up among all adults tested for SARS-CoV-2 (left column, n=186,105), and using different sensitivity analyses including only patients who had a subsequent follow-up visit at our center (2<sup>nd</sup> column, n = 113,198, phenotypes available for testing = 909); (2) patients with a history of care at our institution (3<sup>rd</sup> column, n = 127,699, phenotypes available for testing = 845); using a single phecode as the case definition rather than the standard two phecodes on separate dates (4<sup>th</sup> column, n = 186,105, phenotypes available for testing = 1,309); and a propensity-matched cohort (5<sup>th</sup> column, n = 120,352, phenotypes available for testing = 819). The *y* axis represents phenotypes (as PheWAS codes / “phecodes”) that are group by category within the phecode hierarchy.[10] Cell color intensity illustrates adjusted *p* values by logistic regression. Text in cells show point estimates for effect odds ratios. Text in bold/italic and with a ‘\*’ indicate PheWAS associations that were statistically significant using a Bonferroni correction. Results for phecodes that were significant in the primary analysis (left column) are displayed for brevity. Results in bold/italic text and with a ‘\*’ indicate PheWAS associations that were statistically significant using a Bonferroni-corrected *p* value. Empty cells indicate analyses with insufficient phenotype cases (less than 10) to perform the analysis for that phenotype.

**Figure S7. Changes in vital signs and laboratory test values: all assessed labs.**

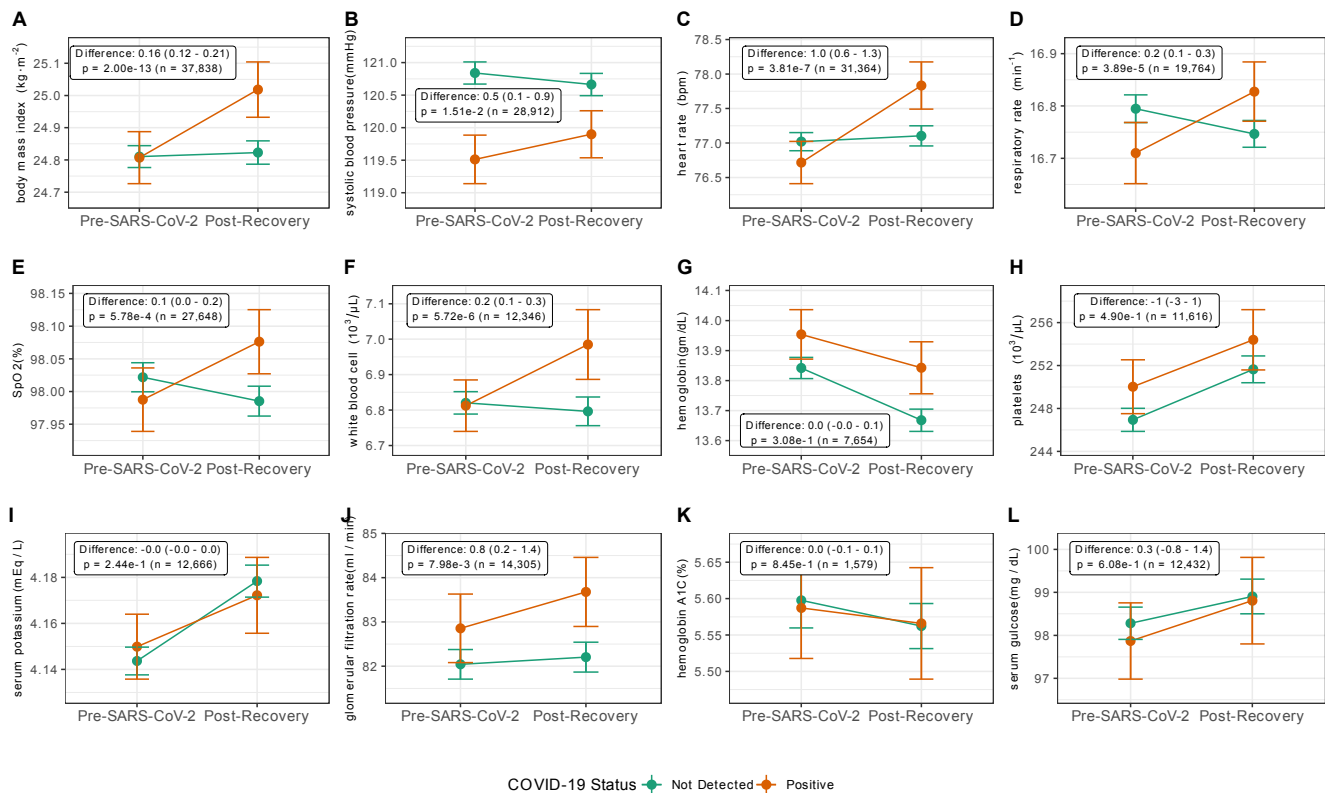

Changes in vital signs and laboratory tests between pre-testing and post-recovery periods among COVID-19 survivors (orange) versus never-infected controls (green). For each patient we used the median pre-testing values obtained during outpatient visits occurring within 180 days before the index SARS-CoV-2 test, and the median post-recovery values obtained during outpatient visits occurring within 365 days after recovery from illness. Dots represent mean values in each exposure group, bars represent standard errors of the mean. Labels represent the adjusted mean difference between COVID-19 survivors and never-infected controls, number of patients with data for each analysis, and p-values obtained by multiple linear regression. (A) Body mass index, (B) systolic blood pressure, (C) heart rate, (D) respiratory rate, (E) oxygen saturation by pulse oximetry, (F) white blood cell count, (G) hemoglobin, (H) platelet count, (I) serum potassium, (J) estimated glomerular filtration rate, (K) hemoglobin A1c, and (L) serum glucose.

**Figure S8. Covariate balance with propensity-score matching.**

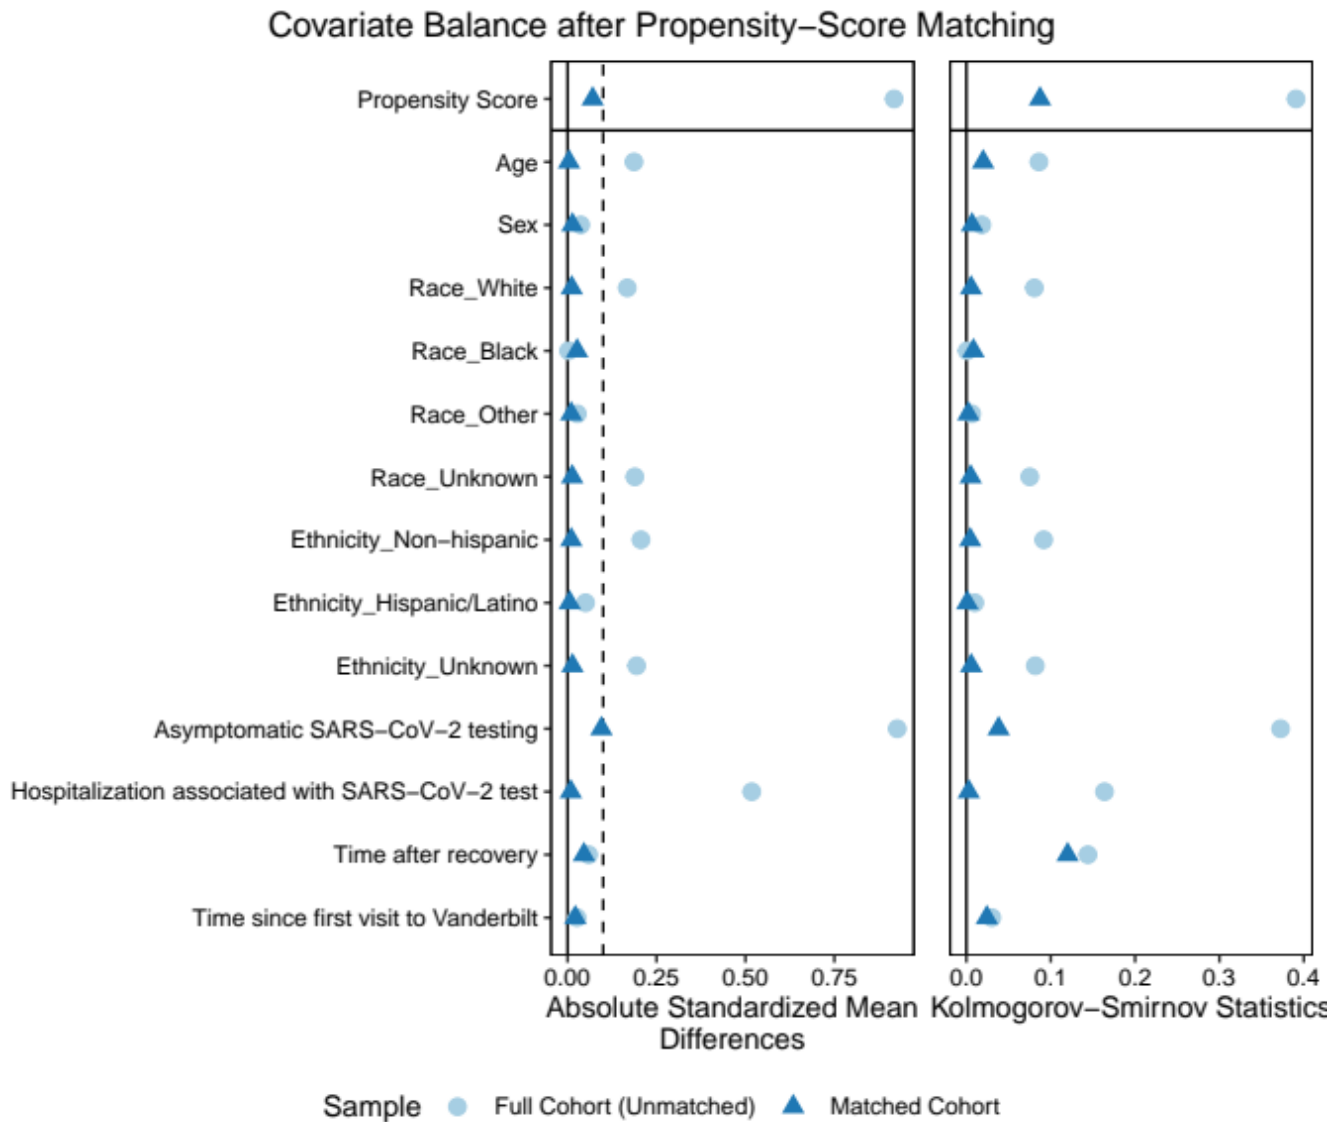

Love plot summarizing of covariate balance before (light blue dots, n=186,105) and after propensity-score matching (blue triangles, n=120,352). The x-axis indicates balance statistic value. The y-axis represents the overall propensity score (above black horizontal line) and each conditioning variable in the propensity scoring model (below black horizontal line). Left graph illustrates absolute standardized mean differences. Right graph illustrates the Kolmogorov-Smirnov statistic (maximum difference in empirical cumulative density function). For the absolute standardized mean difference, a threshold of 0.1 (dashed vertical line) is indicative of good matching between the COVID-19 and never-infected groups. For the Kolmogorov-Smirnov statistic, no specific threshold is recommended but improvements (values closer to zero) are noted for all variables after matching.

**Figure S9. Covariate balance with propensity-score matching for continuous variables.**

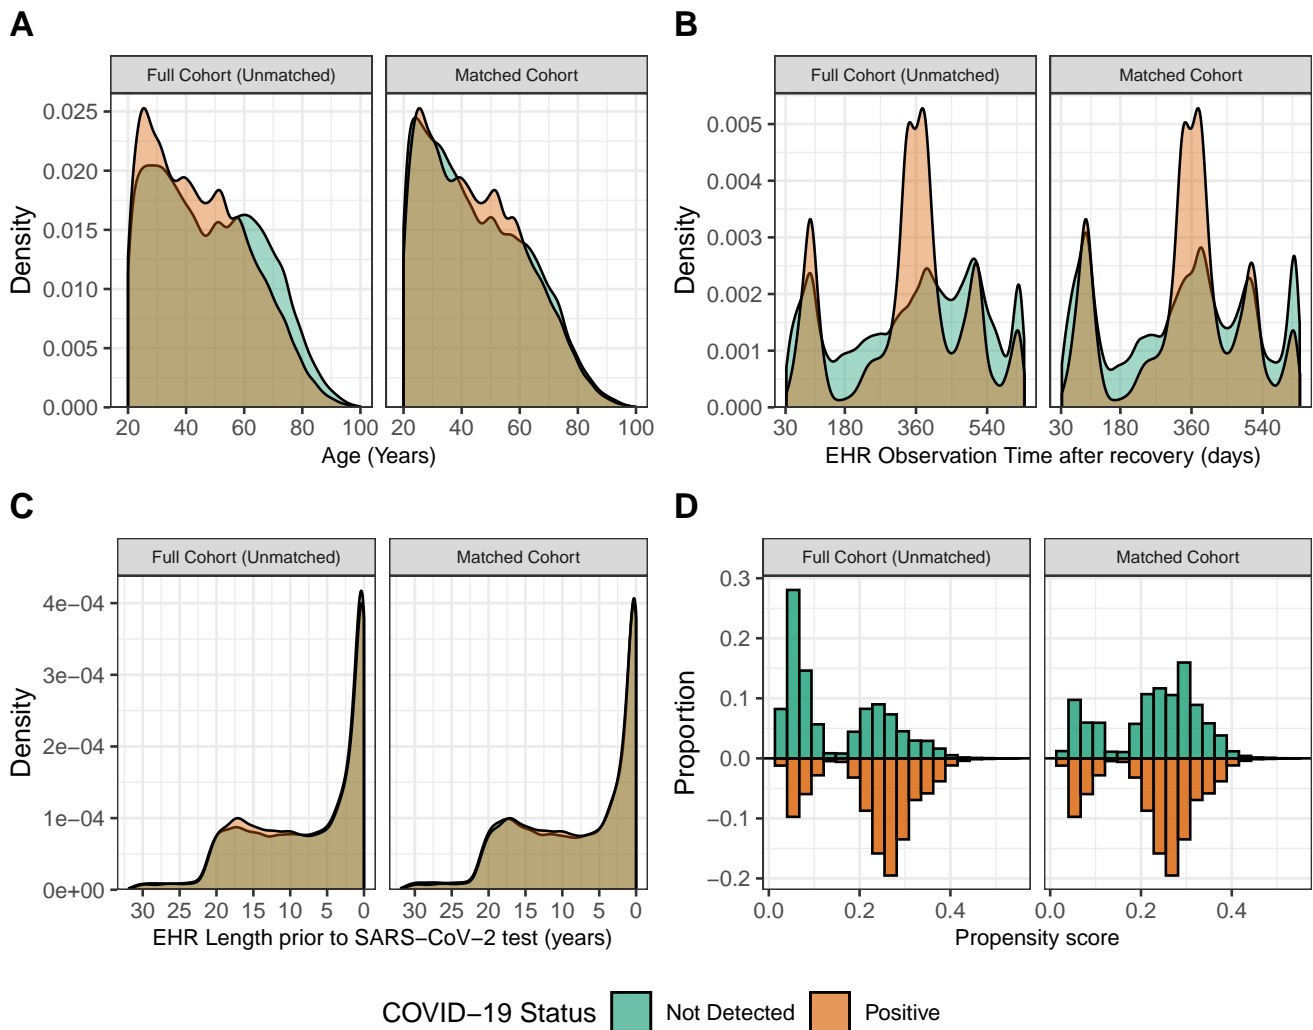

Density plots of **A.** age, **B.** EHR observation time after recovery (in days), **C.** length of EHR record prior to testing (in years), and **D.** histogram of propensity scores both before (full unmatched cohort,  $n=186,105$ ) and after ( $n=120,352$ ) propensity matching. For all variables, we observed an improvement in matching between COVID-19 survivors (orange) and never-infected controls (green). The differences in distributions in observation time **B.** reflect the higher positive test rates during local waves of the pandemic, whereas the distribution of negative tests was more uniform over the course of the pandemic. Propensity matching resulted in acceptable balance for all variables.

## Supplementary References

- 1 Danciu I, Cowan JD, Basford M, *et al.* Secondary Use of Clinical Data: the Vanderbilt Approach. *J Biomed Inform* 2014;**52**:28–35. doi:10.1016/j.jbi.2014.02.003
- 2 FitzHenry F, Resnic FS, Robbins SL, *et al.* Creating a Common Data Model for Comparative Effectiveness with the Observational Medical Outcomes Partnership. *Appl Clin Inform* 2015;**6**:536–47. doi:10.4338/ACI-2014-12-CR-0121
- 3 DeLozier S, Bland S, McPheeters M, *et al.* Phenotyping coronavirus disease 2019 during a global health pandemic: Lessons learned from the characterization of an early cohort. *J Biomed Inform* 2021;**117**:103777. doi:10.1016/j.jbi.2021.103777
- 4 Denny JC, Giuse DA, Jirjis JN. The Vanderbilt Experience with Electronic Health Records. *Semin Colon Rectal Surg* 2005;**16**:59–68. doi:10.1053/j.scrs.2005.08.003
- 5 Feng Q, Wei W-Q, Chaugai S, *et al.* Association Between Low-Density Lipoprotein Cholesterol Levels and Risk for Sepsis Among Patients Admitted to the Hospital With Infection. *JAMA Netw Open* 2019;**2**:e187223. doi:10.1001/jamanetworkopen.2018.7223
- 6 Quan H, Sundararajan V, Halfon P, *et al.* Coding Algorithms for Defining Comorbidities in ICD-9-CM and ICD-10 Administrative Data. *Medical Care* 2005;**43**:1130–9. doi:10.1097/01.mlr.0000182534.19832.83
- 7 Denny JC, Ritchie MD, Basford MA, *et al.* PheWAS: demonstrating the feasibility of a phenome-wide scan to discover gene–disease associations. *Bioinformatics* 2010;**26**:1205–10. doi:10.1093/bioinformatics/btq126
- 8 Ho D, Imai K, King G, *et al.* MatchIt: Nonparametric Preprocessing for Parametric Causal Inference. *Journal of Statistical Software* 2011;**42**:1–28. doi:10.18637/jss.v042.i08
- 9 Greifer N. *cobalt: Covariate Balance Tables and Plots*. 2022. <https://ngreifer.github.io/cobalt/>
- 10 Wu P, Gifford A, Meng X, *et al.* Mapping ICD-10 and ICD-10-CM Codes to Phecodes: Workflow Development and Initial Evaluation. *JMIR Med Inform* 2019;**7**:e14325. doi:10.2196/14325

**The RECORD statement – checklist of items, extended from the STROBE statement, that should be reported in observational studies using routinely collected health data.**

|                           | Item No. | STROBE items                                                                                                                                                                               | Location in manuscript where items are reported   | RECORD items                                                                                                                                                                                                                                                                                                                                                                                                                                       | Location in manuscript where items are reported                                                                                             |
|---------------------------|----------|--------------------------------------------------------------------------------------------------------------------------------------------------------------------------------------------|---------------------------------------------------|----------------------------------------------------------------------------------------------------------------------------------------------------------------------------------------------------------------------------------------------------------------------------------------------------------------------------------------------------------------------------------------------------------------------------------------------------|---------------------------------------------------------------------------------------------------------------------------------------------|
| <b>Title and abstract</b> |          |                                                                                                                                                                                            |                                                   |                                                                                                                                                                                                                                                                                                                                                                                                                                                    |                                                                                                                                             |
|                           | 1        | (a) Indicate the study’s design with a commonly used term in the title or the abstract (b) Provide in the abstract an informative and balanced summary of what was done and what was found | <b>Title and Abstract.</b>                        | <p>RECORD 1.1: The type of data used should be specified in the title or abstract. When possible, the name of the databases used should be included.</p> <p>RECORD 1.2: If applicable, the geographic region and timeframe within which the study took place should be reported in the title or abstract.</p> <p>RECORD 1.3: If linkage between databases was conducted for the study, this should be clearly stated in the title or abstract.</p> | <p>RECORD 1.1:<br/><b>Abstract Methods</b></p> <p>RECORD 1.2:<br/><b>Title, Abstract Methods</b></p> <p>RECORD 1.3:<br/>Not applicable.</p> |
| <b>Introduction</b>       |          |                                                                                                                                                                                            |                                                   |                                                                                                                                                                                                                                                                                                                                                                                                                                                    |                                                                                                                                             |
| Background rationale      | 2        | Explain the scientific background and rationale for the investigation being reported                                                                                                       | <b>Introduction.</b>                              |                                                                                                                                                                                                                                                                                                                                                                                                                                                    |                                                                                                                                             |
| Objectives                | 3        | State specific objectives, including any prespecified hypotheses                                                                                                                           | <b>Introduction.</b>                              |                                                                                                                                                                                                                                                                                                                                                                                                                                                    |                                                                                                                                             |
| <b>Methods</b>            |          |                                                                                                                                                                                            |                                                   |                                                                                                                                                                                                                                                                                                                                                                                                                                                    |                                                                                                                                             |
| Study Design              | 4        | Present key elements of study design early in the paper                                                                                                                                    | <b>Methods. 2.1, 2.2, 2.3, 2.4</b>                |                                                                                                                                                                                                                                                                                                                                                                                                                                                    |                                                                                                                                             |
| Setting                   | 5        | Describe the setting, locations, and relevant dates, including periods of recruitment, exposure, follow-up, and data collection                                                            | <b>Methods 2.1, 2.2<br/>Supplementary Methods</b> |                                                                                                                                                                                                                                                                                                                                                                                                                                                    |                                                                                                                                             |
| Participants              | 6        | (a) <i>Cohort study</i> - Give the eligibility criteria, and the sources and methods of selection of participants. Describe methods of follow-up                                           | <b>(a) Methods 2.1, 2.2, 2.3</b>                  | RECORD 6.1: The methods of study population selection (such as codes or algorithms used to identify subjects) should be listed in detail. If this is not possible, an explanation should be provided.                                                                                                                                                                                                                                              | RECORD 6.1:<br><b>Methods 2.1</b>                                                                                                           |

|                           |    |                                                                                                                                                                                                                                                                                                                                                                                                                                                                                                                                                                      |                                                                                                                                                    |                                                                                                                                                                                                                                                                                                                                                                                                                                                                                         |                                                                                            |
|---------------------------|----|----------------------------------------------------------------------------------------------------------------------------------------------------------------------------------------------------------------------------------------------------------------------------------------------------------------------------------------------------------------------------------------------------------------------------------------------------------------------------------------------------------------------------------------------------------------------|----------------------------------------------------------------------------------------------------------------------------------------------------|-----------------------------------------------------------------------------------------------------------------------------------------------------------------------------------------------------------------------------------------------------------------------------------------------------------------------------------------------------------------------------------------------------------------------------------------------------------------------------------------|--------------------------------------------------------------------------------------------|
|                           |    | <p><i>Case-control study</i> - Give the eligibility criteria, and the sources and methods of case ascertainment and control selection. Give the rationale for the choice of cases and controls</p> <p><i>Cross-sectional study</i> - Give the eligibility criteria, and the sources and methods of selection of participants</p> <p>(b) <i>Cohort study</i> - For matched studies, give matching criteria and number of exposed and unexposed</p> <p><i>Case-control study</i> - For matched studies, give matching criteria and the number of controls per case</p> |                                                                                                                                                    | <p>RECORD 6.2: Any validation studies of the codes or algorithms used to select the population should be referenced. If validation was conducted for this study and not published elsewhere, detailed methods and results should be provided.</p> <p>RECORD 6.3: If the study involved linkage of databases, consider use of a flow diagram or other graphical display to demonstrate the data linkage process, including the number of individuals with linked data at each stage.</p> | <p>RECORD 6.2:<br/><b>Supplementary Methods</b></p> <p>RECORD 6.3:<br/>Not applicable.</p> |
| Variables                 | 7  | Clearly define all outcomes, exposures, predictors, potential confounders, and effect modifiers. Give diagnostic criteria, if applicable.                                                                                                                                                                                                                                                                                                                                                                                                                            | <p>Outcomes:<br/><b>Methods 2.4</b></p> <p>Exposures:<br/><b>Methods 2.5</b></p> <p>Confounders / covariates.<br/><b>Supplementary Methods</b></p> | RECORD 7.1: A complete list of codes and algorithms used to classify exposures, outcomes, confounders, and effect modifiers should be provided. If these cannot be reported, an explanation should be provided.                                                                                                                                                                                                                                                                         | RECORD 7.1.<br><b>Supplementary Methods and Tables S2</b>                                  |
| Data sources/ measurement | 8  | For each variable of interest, give sources of data and details of methods of assessment (measurement). Describe comparability of assessment methods if there is more than one group                                                                                                                                                                                                                                                                                                                                                                                 | <b>Supplementary Methods</b>                                                                                                                       |                                                                                                                                                                                                                                                                                                                                                                                                                                                                                         |                                                                                            |
| Bias                      | 9  | Describe any efforts to address potential sources of bias                                                                                                                                                                                                                                                                                                                                                                                                                                                                                                            | <b>Methods 2.5</b><br><b>Supplementary Methods</b>                                                                                                 |                                                                                                                                                                                                                                                                                                                                                                                                                                                                                         |                                                                                            |
| Study size                | 10 | Explain how the study size was arrived at                                                                                                                                                                                                                                                                                                                                                                                                                                                                                                                            | <b>Methods 2.1</b>                                                                                                                                 |                                                                                                                                                                                                                                                                                                                                                                                                                                                                                         |                                                                                            |
| Quantitative variables    | 11 | Explain how quantitative variables were handled in the analyses. If applicable, describe which groupings were chosen, and why                                                                                                                                                                                                                                                                                                                                                                                                                                        | <b>Methods 2.5,</b><br><b>Supplementary Methods.</b>                                                                                               |                                                                                                                                                                                                                                                                                                                                                                                                                                                                                         |                                                                                            |

|                                  |    |                                                                                                                                                                                                                                                                                                                                                                                                                                                                                                                                                                      |                                                                                               |                                                                                                                                                                                                                                                              |                                                                                            |
|----------------------------------|----|----------------------------------------------------------------------------------------------------------------------------------------------------------------------------------------------------------------------------------------------------------------------------------------------------------------------------------------------------------------------------------------------------------------------------------------------------------------------------------------------------------------------------------------------------------------------|-----------------------------------------------------------------------------------------------|--------------------------------------------------------------------------------------------------------------------------------------------------------------------------------------------------------------------------------------------------------------|--------------------------------------------------------------------------------------------|
| Statistical methods              | 12 | (a) Describe all statistical methods, including those used to control for confounding<br>(b) Describe any methods used to examine subgroups and interactions<br>(c) Explain how missing data were addressed<br>(d) <i>Cohort study</i> - If applicable, explain how loss to follow-up was addressed<br><i>Case-control study</i> - If applicable, explain how matching of cases and controls was addressed<br><i>Cross-sectional study</i> - If applicable, describe analytical methods taking account of sampling strategy<br>(e) Describe any sensitivity analyses | <b>(a), (b) Methods 2.5</b><br><br><b>(c), (d) Supplementary Methods</b>                      |                                                                                                                                                                                                                                                              |                                                                                            |
| Data access and cleaning methods |    | ..                                                                                                                                                                                                                                                                                                                                                                                                                                                                                                                                                                   |                                                                                               | RECORD 12.1: Authors should describe the extent to which the investigators had access to the database population used to create the study population.<br><br>RECORD 12.2: Authors should provide information on the data cleaning methods used in the study. | RECORD 12.1: <b>Supplementary Methods</b><br><br>RECORD 12.2: <b>Supplementary Methods</b> |
| Linkage                          |    | ..                                                                                                                                                                                                                                                                                                                                                                                                                                                                                                                                                                   |                                                                                               | RECORD 12.3: State whether the study included person-level, institutional-level, or other data linkage across two or more databases. The methods of linkage and methods of linkage quality evaluation should be provided.                                    | RECORD 12.3: Not applicable                                                                |
| <b>Results</b>                   |    |                                                                                                                                                                                                                                                                                                                                                                                                                                                                                                                                                                      |                                                                                               |                                                                                                                                                                                                                                                              |                                                                                            |
| Participants                     | 13 | (a) Report the numbers of individuals at each stage of the study ( <i>e.g.</i> , numbers potentially eligible, examined for eligibility, confirmed eligible, included in the                                                                                                                                                                                                                                                                                                                                                                                         | <b>(a) Results 3.1</b><br><br><b>(b) Results 3.1</b><br><br><b>(c) Results 3.1, Figure S1</b> | RECORD 13.1: Describe in detail the selection of the persons included in the study ( <i>i.e.</i> , study population selection) including filtering based on data quality, data availability and linkage. The selection                                       | RECORD 13.1 <b>Results 3.1, Figure S1, Supplementary Methods</b>                           |



|                  |    |                                                                                                                                                                                                                                                                                                                                                                                                                          |                                                       |                                                                                             |  |
|------------------|----|--------------------------------------------------------------------------------------------------------------------------------------------------------------------------------------------------------------------------------------------------------------------------------------------------------------------------------------------------------------------------------------------------------------------------|-------------------------------------------------------|---------------------------------------------------------------------------------------------|--|
|                  |    | study, completing follow-up, and analysed)<br>(b) Give reasons for non-participation at each stage.<br>(c) Consider use of a flow diagram                                                                                                                                                                                                                                                                                |                                                       | of included persons can be described in the text and/or by means of the study flow diagram. |  |
| Descriptive data | 14 | (a) Give characteristics of study participants ( <i>e.g.</i> , demographic, clinical, social) and information on exposures and potential confounders<br>(b) Indicate the number of participants with missing data for each variable of interest<br>(c) <i>Cohort study</i> - summarise follow-up time ( <i>e.g.</i> , average and total amount)                                                                          | <b>(a,b,c) Results 3.1, Table 1.</b>                  |                                                                                             |  |
| Outcome data     | 15 | <i>Cohort study</i> - Report numbers of outcome events or summary measures over time<br><i>Case-control study</i> - Report numbers in each exposure category, or summary measures of exposure<br><i>Cross-sectional study</i> - Report numbers of outcome events or summary measures                                                                                                                                     | <b>Results 3.3, 3.4, 3.5.</b>                         |                                                                                             |  |
| Main results     | 16 | (a) Give unadjusted estimates and, if applicable, confounder-adjusted estimates and their precision ( <i>e.g.</i> , 95% confidence interval). Make clear which confounders were adjusted for and why they were included<br>(b) Report category boundaries when continuous variables were categorized<br>(c) If relevant, consider translating estimates of relative risk into absolute risk for a meaningful time period | <b>Results 3.3, 3.4, 3.5. Tables 3-5 Figures 3, 5</b> |                                                                                             |  |

|                                                           |    |                                                                                                                                                                            |                                                                                                                                                      |                                                                                                                                                                                                                                                                                                          |                                      |
|-----------------------------------------------------------|----|----------------------------------------------------------------------------------------------------------------------------------------------------------------------------|------------------------------------------------------------------------------------------------------------------------------------------------------|----------------------------------------------------------------------------------------------------------------------------------------------------------------------------------------------------------------------------------------------------------------------------------------------------------|--------------------------------------|
| Other analyses                                            | 17 | Report other analyses done—e.g., analyses of subgroups and interactions, and sensitivity analyses                                                                          | <b>Results 3.3.</b><br><b>Subgroup analyses:</b><br><b>Tables S6-S8, Figure 4</b><br><b>Sensitivity analyses:</b><br><b>Tables S9-S12, Figure S6</b> |                                                                                                                                                                                                                                                                                                          |                                      |
| <b>Discussion</b>                                         |    |                                                                                                                                                                            |                                                                                                                                                      |                                                                                                                                                                                                                                                                                                          |                                      |
| Key results                                               | 18 | Summarise key results with reference to study objectives                                                                                                                   | <b>Discussion 4.1</b>                                                                                                                                |                                                                                                                                                                                                                                                                                                          |                                      |
| Limitations                                               | 19 | Discuss limitations of the study, taking into account sources of potential bias or imprecision. Discuss both direction and magnitude of any potential bias                 | <b>Discussion 4.4.</b>                                                                                                                               | RECORD 19.1: Discuss the implications of using data that were not created or collected to answer the specific research question(s). Include discussion of misclassification bias, unmeasured confounding, missing data, and changing eligibility over time, as they pertain to the study being reported. | RECORD 19.1<br><b>Discussion 4.4</b> |
| Interpretation                                            | 20 | Give a cautious overall interpretation of results considering objectives, limitations, multiplicity of analyses, results from similar studies, and other relevant evidence | <b>Discussion 4.1, 4.2, 4.3</b>                                                                                                                      |                                                                                                                                                                                                                                                                                                          |                                      |
| Generalisability                                          | 21 | Discuss the generalisability (external validity) of the study results                                                                                                      | <b>Discussion 4.4</b>                                                                                                                                |                                                                                                                                                                                                                                                                                                          |                                      |
| <b>Other Information</b>                                  |    |                                                                                                                                                                            |                                                                                                                                                      |                                                                                                                                                                                                                                                                                                          |                                      |
| Funding                                                   | 22 | Give the source of funding and the role of the funders for the present study and, if applicable, for the original study on which the present article is based              | <b>Methods 2.6,</b><br><b>Acknowledgments,</b><br><b>Declaration of interests</b>                                                                    |                                                                                                                                                                                                                                                                                                          |                                      |
| Accessibility of protocol, raw data, and programming code |    |                                                                                                                                                                            |                                                                                                                                                      | RECORD 22.1: Authors should provide information on how to access any supplemental information such as the study protocol, raw data, or programming code.                                                                                                                                                 | <b>Data sharing.</b>                 |

\*Reference: Benchimol EI, Smeeth L, Guttman A, Harron K, Moher D, Petersen I, Sørensen HT, von Elm E, Langan SM, the RECORD Working Committee. The REporting of studies Conducted using Observational Routinely-collected health Data (RECORD) Statement. *PLoS Medicine* 2015; in press.

\*Checklist is protected under Creative Commons Attribution ([CC BY](https://creativecommons.org/licenses/by/4.0/)) license.
